# Supplementary material for: Patient reported postoperative pain with a smartphone application: A proof of concept
Source: PLoS One. 2020 May 8;15(5):e0232082. doi: 10.1371/journal.pone.0232082 (PMC7209286; doi:10.1371/journal.pone.0232082)
Supplement: S1 Data — (XLSX) [file pone.0232082.s005.xlsx]

## Sheet: Patient Interview (English)
				How did you like to report your pain with this app?	How much pain have you had after surgery?	I think the app is easy to use	With the app I can record my pain	I find it useful that the app notifies me to record my pain	How attractive did you find the look of the app overall?	How attractive did you find the use of color in the app?	How attractive did you find the fonts used in the app?	How attractive did you find the layout of the app?	How sufficient did you feel the content of the app was in enabling you to record your pain?	Would you like to call for a nurse with the app?	Do you think the in-app instruction movie is clear?	How do you like the in-application the pain intensity chart?	suggestions	unnecessary
				V1	V2	G1	G2	G3	A1	A2	A3	A4	I1	I2	I3	I4	O1	O2
Pt001				2	4	5	5	4	4	4	4	4	4	4	nvt	4
Pt002				1	3	5	5	5	4	5	5	5	5	5	5	5	the application is useful and clear	no, it is suitable for its purpose
Pt003				2	3	5	4	3	3	4	4	4	4	2	4	4	no, it is perfect	no
Pt004				2	1	4	4	3	3	3	3	3	4	3	4	3	the application is oke	no
Pt005				0	0	0	0	0	0	0	0	0	0	0	0	0	addition by researcher EvH: patient was feeling to ill to use the app
Pt006				2	3	4	4	4	3	3	4	5	3	3	0	5	no	no, must be as simple as possible, when being in al lot of pain you might forget to use it
Pt007				0	0	0	0	0	0	0	0	0	0	0	0	0	patient was feeling to ill to fill in the questionnaire
Pt008				3	3	4	4	3	3	4	4	4	5	5	0	3	no
Pt009				3	4	4	4	2	4	4	4	4	4	1	0	4	to be able to record nausea	to be able to contact the nurse
Pt010				3	3	4	4	4	3	4	3	3	3	1	0	3	to be able to record nausea
Pt011				2	2	5	5	4	4	4	4	4	5	5	5	5
Pt012				3	4	5	4	3	4	3	4	4	4	4	0	3
Pt013				3	3	5	5	4	4	4	4	5	5	4	0	4
Pt014				3	4	4	4	4	4	4	4	5	4	3	4	4	shortly after being anesthesized you might not be able to reach out for your smartphone (addition by researcher: the patient meant being too sedated)
Pt015				1	3	5	4	5	4	5	5	4	5	4	4	4	shortly after being anesthesiszed it is difficult to focus on recording pain with the app
Pt016				3	3	5	4	4	4	3	3	3	4	1	0	4	to be able to record pain while being discharged from hospital, to be able to differentiate between location and origine of pain, for example I was suffering from severe postoperative pain	unnecessary to call for the nurse with the app, it is easyier to use the bed bell. In addition, I think the pain chart was not useful. As a patient you know if your pain is less or worse, the pain chart might be useful for the healthcare professional
Pt017				2	4	4	4	5	4	4	4	4	5	3	3	4		no
Pt018				2	2	5	4	5	4	3	3	3	5	3	0	4	no, the application is fine to use and the notifications are useful	to be able to contact the nurse
Pt019				2	3	5	5	5	5	5	5	5	5	3	5	4	no	no
Pt020				2	5	5	4	4	4	4	4	4	4	5	0	4	no	no
Pt021				1	1	5	5	5	5	5	5	5	4	5	0	5	at first use it was not clear for me which pain score I selected, only later did I see that there was a bar around it	to call for a nurse in principe, there is already a button next to my bed for that purpose. On the otherhand it might be useful when using the application then it saves a doule action
Pt022				1	3	5	5	5	5	5	5	5	5	1	0	5	no, the application is very clear	the choice of recording pain in rest or during movement, the first day's in hospital you mainly lie still
Pt023				3	3	0	0	0	0	0	0	0	0	0	0	0	I did not use the application, for me it was a very tough surgical procedure, afterwards I felt sick and weak. Furthermore I was not in pain so I did not remember to use the application. I did not use my telephone much during addmision. In addition, seeing the applications notification to score pain did not motivate me to use it
Pt024				2	1	5	5	5	4	5	5	5	5	3	4	5	voor mij was hij goed	no
Pt025				3	3	5	5	3	4	4	4	4	4	4	0	5	no	no
Pt026				3	3	4	4	1	4	4	5	5	5	1	0	5
Pt027				3	3	4	4	4	4	4	4	4	4	1	0	4	to add a game to make the application more attractive (e.g. for children)
Pt028				3	4	5	5	4	4	3	4	4	5	5	0	5	no	no it is very userfriendly
Pt029				2	3	4	4	4	4	4	4	4	3	5	4	5	to add more information about the pain scale (e.g. severe, very severe and to be able to differentiate between different types of movement (e.g. turning in bed or taking a shower)	to call for the nurse, because it does not work. In case of emergancy you will use the button next to your bed, but during the recording of pain it might be useful
Pt030				2	4	5	5	5	4	3	4	4	5	4	0	4
Pt031				2	2	4	4	4	4	4	4	5	5	1	3	4
Pt032				2	4	5	4	5	4	5	4	5	5	5	0	4	give colours to the painscale smilies to indicate the severity of pain, the notification must be more polite. To be able to call for the nurse might be useful the nurse bell next to my bed was broken
Pt033	Samsung galaxy S8			0	0	0	0	0	0	0	0	0	0	0	0	0
Pt034				2	2	3	3	3	4	4	4	4	4	4	4	4
Pt035				2	3	4	4	5	4	4	4	3	4	5	0	3	add information about pain and which medication to use	no, it is simple to use
Pt036	Tablet android version 5,1 model K960			3	3	4	4	4	4	3	4	4	3	0	0	2	the pain chart must differentiate between rest and movement and the date and time stamps must be added. Give colour (highlighting) to the pain scale when you have chosen and recorded a certain pain score
Pt037				2	3	5	5	4	4	4	4	4	5	5	0	4	no improvements, the app is simple to use, keep it this way	no
Pt038				3	3	4	4	4	4	4	4	4	1	1	1	4	…well an app, calling the nurse with the bed bell is sufficient en regularly somebody is checking on you	I dont think the app is of added value
Pt039				2	3	5	5	5	5	5	5	5	5	5	0	5
Pt040				2	4	5	5	4	4	5	4	4	4	5	4	4
Pt041				2	3	4	4	4	4	4	4	4	4	5	4	4
Pt042				2	4	4	4	4	4	4	4	4	4	4	0	4
Pt043	Samsung galaxy S8 score 0 en 10 did not work			2	2	5	5	5	4	4	5	5	5	1	0	5	the app can only be used with your telephone in vertical position it does not turn horizontal when lying in bed	to be able to contact the nurse
Pt044																		drop out
Pt045				1	4	5	5	5	5	5	5	5	5	4	5	5
Pt046				3	3	4	4	4	5	5	5	5	5	5	5	5	no	no
Pt047				2	3	5	5	5	4	4	5	5	5	4	5	5	date and time stamp in the pain chart	no
Pt048				3	3	5	5	5	3	3	4	4	5	3	0	4	add an anatomical figure to indicate the location of your pain, to be able to record nausea	no
Pt049																		drop out
Pt050				2	4	5	5	5	4	4	5	4	5	3	4	4	I think it is a pity that you can not send a message to a healthcare professional	no
Pt051				3	3	5	5	5	4	4	5	5	5	5	5	5
Pt052				1	4	1	1	1	5	5	5	5	5	5	5	5	I like it this way	no

## Sheet: Patient Interview (Dutch)
				hoe vond u het om met deze app de mate van pijn aan ons door te kunnen geven?	Hoeveel last heeft u gehad van pijn na deze operatie?	Ik vind de app makkelijk te gebruiken	Met de app kan ik mijn pijn goed doorgeven.	Ik vind het handig dat de app mij eraan herinnert door te geven hoeveel pijn ik heb.	Hoe vindt u de app eruit zien?	Wat vindt u van de gebruikte kleuren in de app?	Wat vindt u van het gebruikte lettertype in de app?	wat vindt u van de indeling van de app	hoe vindt u het invulen van uw pijnscore in de app	zou u een verpleegkundige willen oproepen in de app	vindt u de instructiefil duidelijk?	wat vindt u van de grafiek die de app laat zien	iets toevoegen?	overbodig?
				V1	V2	G1	G2	G3	A1	A2	A3	A4	I1	I2	I3	I4	O1	O2
Pt001				2	4	5	5	4	4	4	4	4	4	4	nvt	4
Pt002				1	3	5	5	5	4	5	5	5	5	5	5	5	app is handig en overzichtelijk	nee wat er voor nu nodig is staat erin
Pt003				2	3	5	4	3	3	4	4	4	4	2	4	4	nee gaat perfect	nee hoor
Pt004				2	1	4	4	3	3	3	3	3	4	3	4	3	vind het goed zo	nee
Pt005				0	0	0	0	0	0	0	0	0	0	0	0	0	pt was te ziek om app te gebruiken en vragenlijst in te vullen
Pt006				2	3	4	4	4	3	3	4	5	3	3	0	5	nee	nee, moet zo simpel mogelijk blijven. Bij veel pijn vergeet je soms wel om de app in te vullen
Pt007				0	0	0	0	0	0	0	0	0	0	0	0	0	pt was te ziek om app te gebruiken en vragenlijst in te vullen
Pt008				3	3	4	4	3	3	4	4	4	5	5	0	3	nee=prima
Pt009				3	4	4	4	2	4	4	4	4	4	1	0	4	wat meer kunnen invullen hoe je je voelt bv misselijkheid	om de verpleging op te kunnen roepen
Pt010				3	3	4	4	4	3	4	3	3	3	1	0	3	misselijkheid toevoegen
Pt011				2	2	5	5	4	4	4	4	4	5	5	5	5
Pt012				3	4	5	4	3	4	3	4	4	4	4	0	3
Pt013				3	3	5	5	4	4	4	4	5	5	4	0	4
Pt014				3	4	4	4	4	4	4	4	5	4	3	4	4	uit de narcose kan je niet meteen je gsm bereiken (toevoeging EH: uit gesprek kwam dat mr bedoelde dat je vaak nog suffig bent en niet meteen je tel er bij pakt
Pt015				1	3	5	4	5	4	5	5	4	5	4	4	4	als je uit de narcose komt is het lastig om je te focussen. Toen was het gebruik een stuk minder
Pt016				3	3	5	4	4	4	3	3	3	4	1	0	4	pijn ook kunnen invullen na de operatie thuis. Dit is nl het moment waarop je echt pijn gaat kjrijgen. Een ander punt is dat je geen verschil maakt in pijn. Zo had ik bv geen pijn aan de operatie, maar wel hele vervelende hoodpijn.	overbodig: oproepen van de vpk. Je kan dit nu via 2 systemen. Bel is makkelijker. Ook de grafiek vond ik zelf niet heel nuttig. Je weet zelf namelijk wel hoe de pijn verloopt, lijkt me alleen handig voor de specialist
Pt017				2	4	4	4	5	4	4	4	4	5	3	3	4	nee alles is duidelijk	nee
Pt018				2	2	5	4	5	4	3	3	3	5	3	0	4	nee de app is prima te gebruiken en de melding om de app in te vullen is handig	het roepen van de verpleging
Pt019				2	3	5	5	5	5	5	5	5	5	3	5	4	nee	nee
Pt020				2	5	5	4	4	4	4	4	4	4	5	0	4	nee	nee
Pt021				1	1	5	5	5	5	5	5	5	4	5	0	5	bij de eerste keer gebruik, zag ik niet of ik het pijncijfer wel had geselecteerd later viel me pas op dat er een balk omheen zit	in principe het oproepen van de verpleegkundige, omdat er al een knop aanwezig is voor de functie. Aan de andere kant is het wel een fijne nfunctie omdat je toch al bezig bent met de app en het een dubbele handeling scheelt
Pt022				1	3	5	5	5	5	5	5	5	5	1	0	5	nee, was geheel duidelijk	keuze tussen rust en bewegen. Eerste paar dagen lig je toch vnl stil in het ZH
Pt023				3	3	0	0	0	0	0	0	0	0	0	0	0	ik heb de app niet gebruikt, ik vond het een hele heftige operatie en voelde me beroerd en slap. Ik had geen pijn en werd dus ook niet herinnerd aan het invullen van de App. Mijn telegfoon heb ik bijna niet aangeraakt. De app was extra em bij het zien van de notificaties dacht ik nee nu even niet
Pt024				2	1	5	5	5	4	5	5	5	5	3	4	5	voor mij was hij goed	nee
Pt025				3	3	5	5	3	4	4	4	4	4	4	0	5	nee	nee
Pt026				3	3	4	4	1	4	4	5	5	5	1	0	5
Pt027				3	3	4	4	4	4	4	4	4	4	1	0	4	bv een spelletje toevoegen (leuk voor kinderen)
Pt028				3	4	5	5	4	4	3	4	4	5	5	0	5	nee	nee was heel gebruiks vriendelijk
Pt029				2	3	4	4	4	4	4	4	4	3	5	4	5	graag meer uitleg bij de smilies: bv heftig, zeer heftig enz. en onderscheid tussen soorten bewegen bv draaien in bed of douchen	oproepen VPK want hij werkt niet. Bij nood gebruik je de knop aan het bed, maar als je toch al je pijn score aan het invullen bent is het wel handig
Pt030				2	4	5	5	5	4	3	4	4	5	4	0	4
Pt031				2	2	4	4	4	4	4	4	5	5	1	3	4
Pt032				2	4	5	4	5	4	5	4	5	5	5	0	4	smilies in kleur want dat geeft duidelijker het gevoel van de smilie weer en de notificatie mag wat beleerfder nu komt het over van je MOET. VPK oproepen is wel handig aangezien de bel naast mn bed kapot was dus handig als backup
Pt033	Samsung galaxy S8			0	0	0	0	0	0	0	0	0	0	0	0	0
Pt034				2	2	3	3	3	4	4	4	4	4	4	4	4
Pt035				2	3	4	4	5	4	4	4	3	4	5	0	3	meer info over pijn indien gewenst en bijbehorende medicatie	nee juist mooi clean design
Pt036	Tablet android versie 5,1 modelK960			3	3	4	4	4	4	3	4	4	3	0	0	2	in grafiek onderscheid maken in rust en bewegen en tijden. De smilys een kleur geven als je gekozen hebt is duidelijker
Pt037				2	3	5	5	4	4	4	4	4	5	5	0	4	op zich niet, app is mooi compact hou het zo	nee
Pt038				3	3	4	4	4	4	4	4	4	1	1	1	4	tja een app. Bellen gaat prima en er komt regelmatig iemand langs om te vragen hoe het is	ik vind de app persoonlijk niet van toegevoegde waarde
Pt039				2	3	5	5	5	5	5	5	5	5	5	0	5
Pt040				2	4	5	5	4	4	5	4	4	4	5	4	4
Pt041				2	3	4	4	4	4	4	4	4	4	5	4	4
Pt042				2	4	4	4	4	4	4	4	4	4	4	0	4
Pt043	Samsung galaxy S8 score 0 en 10 werkte niet			2	2	5	5	5	4	4	5	5	5	1	0	5	app draait niet met de telefoon mee	contact met de VPK
Pt044																		drop out
Pt045				1	4	5	5	5	5	5	5	5	5	4	5	5
Pt046				3	3	4	4	4	5	5	5	5	5	5	5	5	nee	nee
Pt047				2	3	5	5	5	4	4	5	5	5	4	5	5	de tijden van de grafiek	nee
Pt048				3	3	5	5	5	3	3	4	4	5	3	0	4	poppetje om aan te geven waar je pijn hebt. Misselijkheid wanneer dit niet te erg is fijn om het door te geven	nee
Pt049																		drop out
Pt050				2	4	5	5	5	4	4	5	4	5	3	4	4	ik vind hetjammer dat je geen bericht toe kan voegen	nee
Pt051				3	3	5	5	5	4	4	5	5	5	5	5	5
Pt052				1	4	1	1	1	5	5	5	5	5	5	5	5	ik vind het goed zo	nee

## Sheet: Stake Holder Interview
	Grafisch interface of the appication	Navigation through the application	Pain questions	Graphoic	Suggestions
Physician assistant	Composed and clear Screen layout not properly aligned Various font styles Omit faces scale BT		Clear and understandable questions . Adjust feedback to patients input eg. what action is taken?	Display pain scores at rest and during movement with separate lines. Add medication administration and medication use to the app	Patients pain scores are not related to clear feedback on actions taken by the healthcare professionals and the use of medication
Nurse acute pain service	The app looks appealing. Fine design	After filling in 'patient' name a popup appears with the announcement to wait. It was not clear what do because notthing happened. It would help to add a waiting table to see the progress of authentication	Patient should not be able to call for the acute pain service. This is a task for nurses or the ward doctor Patients and Nurses interpret painsocres differently. Pain score 6 is for most patients intermediate, bearable pain. However nurses interpret a painscore of 6 in patients as almost severe pain. In the app scores 0 and 10 are indicated with 'no pain' and 'worst pain inmiginable'. Why not ind…
Intern anesthesiology	Modern look Negative association with Facebook Activating and deactivating the 'pain at rest' and 'pain during movement' buttons must be possibele pressing the same button again. Now deactivating is done by pressing the opposite button. Screen grouping and proportion looks odd, especially the main screen	Screen navigation buttons at the botton of the screen are to small to read The pain scoring screen is the first screen but has no navigation bullet which indicates how many screens will follow. Scrolling backward in the app is difficult. Pressing on the edges of the screen throws you back to the begin screen to fill in your pain score with no scores and answers saved so you can start all over aga…	relevant, short and few (positive) questions It is possible to scroll foreward in the app without answering all questions. When by incidence not answering all questions it is not possible to conform en record pain. It is not possible to see the range of the scroller at a glance	Graphic needs to be adjusted, bigger, more detailed and informative, differrnetiation between rest and movement pain, time and date.
Anesthesiologist / pain	Clear appearance	navigating through the app is easy en quick	Is the nurse or APS informed in EPD when the patient records pain. Are you afraid that patients will manipulate their pain scores for better care?	the usefulness of the graphic for patients is questionable. For nurses and docter it showes a more detailled course of the pian Graphic shows no insight in the treatment of pain so add manication administration	multilingualism? Adjust the graphic with medication administration, advise and information but perhaps the focus during admission is too much on pain. With the combination pain scores en medication administration you provide patients with more detailed information
Intern anesthesiology	Interface is handy and clear Slider must be bigger	Easy to understand	Reformulate the last question, contact verpleegkundige, this question is also not in line with the other questions. No pain, must be bearable and no adjustment of medication is not requierd. Being in a lot of pain wich is unbearable automaticly must alarm the nurse More detailed feedback agt the end of the recording. What may the patient expect afther their pain recording	The graphic scale is too big Axis are unclear add date and time per recording No differentiation between in the degree of pain and rest and movement add medication administration .	Broader slider so its clear to see more of the scale (4 or 5 faces).
Software Engineer	app looks appealing, use of collors and fonds is appropriate, design suits the purpose of the app, userfriendly, smiple amnd quick	Navigation is easy.het navigeren gaat gemakkelijk en is goed in gebruik. Alleen de knop hoe werkt het, hier is een optie voor de zoekbalk en die is niet recht	Questions are short and clear. Highlight the scroler and faces scale. Why not rest and movement now you have to choose one of both	Graphic is clear, maybe add mean scores of all patients	Nothing to add, unnecessary to ask patients futher questions when the score 0. The how it works section is nor properly aligned.
Member patientcouncil	The app looks userfriendly, neutural no disturbing colorsde app. Fonds are appropriate, clear presentation	Navigating is easy, slider is nog clear seems if you have to push the slider to confimr pain intensity but that is not the case. The scale of te slider is not clear enough	Questions are clear. Rest and movement is a separate question apart from pain intensity	Garaphic is not clear must ber more detailed, add date and time, add normal references (mean scores of other patients). Garphic could be informative in caes of readmission. In case of onley a single admission it s usfulens is questionable	Slider need some clearification, bigger, highlighting the chosen painintensity score. When a patient records 0 no other questions, the question rest and movement must be asked separately and not togheter with pain intensity
Member patientcouncil	Collors are appropriate, OLVG look and feel, buttons rest and movement are different size	navigating easy	 Is your pain bearable? no is not an option because when it is not bearable patients are not able to recerd their pain. It is possible that patients exaggerate their pain because they want to be taken seriously  Faces scale is difficult to understand because of minimal differences between the different stages of pain  question 'do you need extra analgesia': addimmediately Feedback pain score i…	Graphic is not clear, axis must be adjusted Course of the pain is nont clear In 3D?? Mean score of other patiens must be added with on of function. Be aware of negative (nocebo) effect of adding mean scores	When pain is 0 do not ask patient to fill out the other questions. App must be available in more languages. Pain often accompanies anxiety perhaps add anxiety questions to the app
Anesthesiologist / pain	app looks appealing, OLVG look and feel, proffessional design	navigating through the app almost automatically	Slider/scroller is clear. Pain questions are clear. Feedback is sufficient, but feedback could be better and adjusted to the patients score	The function of graphic is questionable what is the added value for patients, they might be to foccused on their pain. Adding mean scores from other patients is a bad idea because: focus on their pain, pain is a unique and individual experience, placebo but also nocebe effect
Nurse acute pain service	appealing, simple and easy to use, colors used provide a calm appearance	easy	Cleur and understanding questions. Better differentiation between pain at rest and during movement de slider, perhaps in separate questions, Slider/scrolle is sufficient, maybe default o 5, the scale of the slider is not clear at a glance. Important to recognize for healthcare professionals, no extra analgesia but unbearable pain. in-app feedback disappears to fast	the graphic/chart is useful. Must be more informative, adjust the, better differtiation between pain at rest and during movement. Adding mean scores of other patients seems not a good idea, pain is an individual experience better not influenced by others	ws
Anesthesiologist / pain	application looks appealing and easy to use		Maby change the term bearable into acceptable, being able to contact the nurse with the app might be a good idea, change extra analgesia into should something be done about your pain	X axis is not clear. In-app comparison with other patients is not approriated	Adjust the scale of the graphic to one hour, this app is the future. Extra analgesia suggest the administration medication. Maybe a more neutral question is better, sohould something be done about your pain. Marking or highlightning the slider when a pain intensity is chosen
Anesthesiologist / pain	appealing, userfriendly design, navigating is easy	Clear questions, maybe restructure some of the questions, are you in pain, more empathetic feedback, slider maybe unclear for the older patient	Possible not suitable for patients, adding mean scores of other patients may result could positively or negatively influence the patient, painscores of different paptients with different procedures are not comparable		To make the application more attractive you could give it een more personal charachter: name of the patient in the app??

## Sheet: NRS recorings Nurse
Pt number	Geslacht patiënt	lft op moment ok	DT_PAT__VERTR_RECO	aantal_metingen	dt_VASmeting_1	dt_VASmeting_2	dt_VASmeting_3	dt_VASmeting_4	dt_VASmeting_5	dt_VASmeting_6	dt_VASmeting_7	dt_VASmeting_8	dt_VASmeting_9	dt_VASmeting_10	dt_VASmeting_11	dt_VASmeting_12	dt_VASmeting_13	dt_VASmeting_14	dt_VASmeting_15	dt_VASmeting_16	dt_VASmeting_17	dt_VASmeting_18	dt_VASmeting_19	dt_VASmeting_20	dt_VASmeting_21	dt_VASmeting_22	dt_VASmeting_23	dt_VASmeting_24	dt_VASmeting_25	dt_VASmeting_26	dt_VASmeting_27	dt_VASmeting_28	dt_VASmeting_29	dt_VASmeting_30	dt_VASmeting_31	dt_VASmeting_32	dt_VASmeting_33	dt_VASmeting_34	dt_VASmeting_35	dt_VASmeting_36	dt_VASmeting_37	dt_VASmeting_38	dt_VASmeting_39	dt_VASmeting_40	dt_VASmeting_41	dt_VASmeting_42	dt_VASmeting_43	VASscore_1	VASscore_2
001	Vrouw	67	2017-10-04 14:20:04	9	2017-10-04 17:02:01	2017-10-05 06:10:35	2017-10-05 09:16:33	2017-10-05 12:07:54	2017-10-05 17:16:16	2017-10-05 20:40:07	2017-10-06 06:59:10	2017-10-06 08:51:30	2017-10-06 12:10:08																																			3	3
002	Vrouw	57	2017-10-04 16:41:17	6	2017-10-04 20:40:07	2017-10-04 21:18:29	2017-10-05 06:18:02	2017-10-05 17:02:40	2017-10-05 20:04:00	2017-10-05 20:15:27																																						0	4
003	Man	41	2017-10-09 17:59:20	4	2017-10-09 20:20:37	2017-10-09 20:23:48	2017-10-09 20:24:03	2017-10-10 08:01:40																																								3	3
004	Vrouw	47	2017-10-06 05:44:45	3	2017-10-06 07:54:19	2017-10-06 11:47:30	2017-10-06 16:58:01																																									2	1
005	Vrouw	26	2017-10-09 15:45:35	27	2017-10-09 16:26:06	2017-10-09 16:27:44	2017-10-09 20:46:46	2017-10-09 20:52:21	2017-10-09 21:52:05	2017-10-10 03:37:22	2017-10-10 06:51:20	2017-10-10 09:51:47	2017-10-10 09:52:51	2017-10-10 12:49:31	2017-10-10 17:09:59	2017-10-10 18:57:32	2017-10-11 00:33:32	2017-10-11 03:51:49	2017-10-11 08:18:27	2017-10-11 08:28:23	2017-10-11 11:44:16	2017-10-11 11:56:02	2017-10-11 17:22:59	2017-10-11 21:53:32	2017-10-11 22:00:22	2017-10-11 23:59:08	2017-10-12 03:03:52	2017-10-12 05:25:31	2017-10-12 08:57:13	2017-10-12 11:22:00	2017-10-12 13:08:50																	3	3
006	Vrouw	60	2017-10-06 12:16:36	3	2017-10-06 15:21:18	2017-10-06 17:05:36	2017-10-07 08:33:56																																									3	5
007	Vrouw	51	2017-10-06 05:42:26	8	2017-10-06 08:12:55	2017-10-06 08:13:34	2017-10-06 11:43:21	2017-10-06 17:08:31	2017-10-06 17:10:28	2017-10-06 20:22:29	2017-10-07 07:26:19	2017-10-07 08:43:29																																				6	6
008	Vrouw	52	2017-10-09 16:08:52	6	2017-10-09 17:19:51	2017-10-09 21:13:31	2017-10-10 08:16:17	2017-10-10 08:17:18	2017-10-10 11:38:40	2017-10-10 17:22:41																																						0	0
009	Vrouw	63	2017-10-09 15:31:40	19	2017-10-09 16:14:40	2017-10-09 17:07:46	2017-10-09 17:36:32	2017-10-09 21:38:14	2017-10-09 21:38:52	2017-10-10 10:19:23	2017-10-10 11:51:12	2017-10-10 13:06:54	2017-10-10 16:54:11	2017-10-10 21:14:20	2017-10-11 05:25:02	2017-10-11 08:23:55	2017-10-11 11:45:46	2017-10-11 14:00:13	2017-10-11 22:33:40	2017-10-12 07:52:30	2017-10-12 07:59:12	2017-10-12 11:44:58	2017-10-12 14:37:13																									8	8
010	Man	72	2017-10-10 15:41:20	12	2017-10-10 20:20:44	2017-10-11 04:18:06	2017-10-11 06:28:47	2017-10-11 08:34:06	2017-10-11 11:39:21	2017-10-11 13:18:20	2017-10-11 17:33:23	2017-10-11 21:21:07	2017-10-13 05:49:36	2017-10-13 07:51:33	2017-10-13 10:33:25	2017-10-13 12:04:22																																3	2
011	Man	56	2017-10-11 15:01:37	2	2017-10-11 21:02:03	2017-10-12 08:48:48																																										4	3
012	Man	67	2017-10-12 11:05:32	19	2017-10-12 17:23:53	2017-10-12 20:53:52	2017-10-12 23:42:19	2017-10-13 03:48:22	2017-10-13 06:49:00	2017-10-13 11:27:07	2017-10-13 13:48:29	2017-10-13 17:28:45	2017-10-13 19:35:03	2017-10-13 21:06:06	2017-10-13 21:07:09	2017-10-14 03:01:14	2017-10-14 05:40:01	2017-10-14 08:19:03	2017-10-14 08:19:20	2017-10-14 10:47:36	2017-10-14 10:48:14	2017-10-14 11:59:00	2017-10-14 14:57:36																									4	4
013	Vrouw	65	2017-10-12 16:34:26	15	2017-10-12 19:58:14	2017-10-13 05:48:06	2017-10-13 08:42:29	2017-10-13 08:42:58	2017-10-13 09:48:51	2017-10-13 09:53:33	2017-10-13 11:32:07	2017-10-13 11:49:00	2017-10-13 13:52:37	2017-10-13 17:35:44	2017-10-13 17:36:12	2017-10-13 20:58:31	2017-10-13 21:00:19	2017-10-14 05:41:31	2017-10-14 08:11:14																													5	2
014	Man	51	2017-10-13 05:38:44	4	2017-10-13 12:27:47	2017-10-13 12:42:53	2017-10-13 17:04:58	2017-10-13 17:05:15																																								3	5
015	Vrouw	47	2017-10-13 09:57:57	7	2017-10-13 12:00:13	2017-10-13 14:40:56	2017-10-13 17:04:49	2017-10-13 17:04:58	2017-10-13 21:01:37	2017-10-13 22:09:09	2017-10-14 08:07:30																																					5	3
016	Man	53	2017-10-13 12:38:48	5	2017-10-13 14:31:16	2017-10-13 16:58:50	2017-10-13 20:33:10	2017-10-13 20:33:32	2017-10-14 07:52:51																																							4	4
017	Vrouw	21	2017-10-16 13:09:33	10	2017-10-16 16:32:57	2017-10-16 16:33:08	2017-10-16 20:51:35	2017-10-16 23:23:50	2017-10-17 08:04:15	2017-10-17 08:04:32	2017-10-17 12:06:07	2017-10-17 17:16:45	2017-10-17 17:17:31	2017-10-17 21:43:25																																		3	3
018	Vrouw	35	2017-10-16 14:59:51	4	2017-10-16 15:15:56	2017-10-16 17:28:53	2017-10-17 06:23:59	2017-10-17 08:13:34																																								3	0
019	Vrouw	53	2017-10-16 16:45:18	6	2017-10-16 17:10:41	2017-10-16 21:09:59	2017-10-17 06:21:03	2017-10-17 08:18:19	2017-10-17 12:00:50	2017-10-17 16:50:24																																						2	3
020	Vrouw	64	2017-10-17 13:47:50	5	2017-10-17 17:20:00	2017-10-17 17:26:42	2017-10-18 07:57:36	2017-10-18 07:59:19	2017-10-18 11:32:00																																							4	4
021	Vrouw	36	2017-10-19 17:36:42	4	2017-10-19 22:58:35	2017-10-20 08:06:39	2017-10-20 09:13:22	2017-10-20 11:55:43																																								5	5
022	Vrouw	32	2017-10-19 10:21:39	8	2017-10-19 12:22:08	2017-10-19 13:26:39	2017-10-19 20:16:27	2017-10-20 08:42:58	2017-10-20 08:57:13	2017-10-20 12:33:56	2017-10-20 14:34:15	2017-10-20 17:15:53																																				4	2
023	Vrouw	66	2017-10-20 06:13:49	4	2017-10-20 09:03:42	2017-10-20 12:40:39	2017-10-20 14:41:59	2017-10-20 17:19:14																																								7	0
024	Vrouw	65	2017-10-23 15:45:39	3	2017-10-23 16:49:39	2017-10-23 20:40:07	2017-10-24 11:46:59																																									4	4
025	Man	67	2017-10-23 15:50:16	16	2017-10-23 17:30:43	2017-10-23 19:47:44	2017-10-23 22:43:24	2017-10-24 06:50:28	2017-10-24 08:35:16	2017-10-24 11:14:11	2017-10-24 13:00:39	2017-10-24 17:25:41	2017-10-24 21:41:42	2017-10-25 08:05:40	2017-10-25 13:53:07	2017-10-25 23:10:30	2017-10-26 05:15:01	2017-10-26 09:10:35	2017-10-26 11:26:32	2017-10-26 13:01:44																												7	6
026	Man	57	2017-10-19 15:58:50	6	2017-10-19 17:54:57	2017-10-19 17:55:08	2017-10-19 21:05:24	2017-10-19 21:05:59	2017-10-20 08:22:40	2017-10-20 11:40:45																																						8	8
027	Vrouw	59	2017-10-20 13:49:12	10	2017-10-20 14:08:45	2017-10-20 17:35:57	2017-10-20 17:36:10	2017-10-20 21:02:54	2017-10-20 21:32:59	2017-10-20 21:33:13	2017-10-21 07:13:28	2017-10-21 17:36:18	2017-10-21 19:43:39	2017-10-21 19:45:56																																		5	4
028	Man	56	2017-10-24 15:14:32	4	2017-10-24 16:33:09	2017-10-24 19:41:06	2017-10-25 06:38:39	2017-10-25 08:17:14																																								6	4
029	Vrouw	32	2017-10-23 11:59:08	5	2017-10-23 17:36:06	2017-10-23 17:36:48	2017-10-23 18:27:12	2017-10-24 09:20:59	2017-10-24 16:47:26																																							4	4
030	Vrouw	34	2017-10-24 17:04:17	5	2017-10-24 17:10:18	2017-10-24 20:32:03	2017-10-24 20:49:42	2017-10-25 07:56:22	2017-10-25 11:42:41																																							2	6
031	Man	27	2017-10-24 18:00:01	4	2017-10-24 20:49:23	2017-10-25 08:53:57	2017-10-25 08:54:35	2017-10-25 11:56:46																																								3	2
032	Man	34	2017-10-24 16:37:02	3	2017-10-24 17:57:52	2017-10-24 23:02:14	2017-10-25 08:49:21																																									4	2
033	Man	42	2017-10-27 16:00:57	5	2017-10-27 17:51:24	2017-10-27 21:11:06	2017-10-27 21:12:36	2017-10-28 06:34:13	2017-10-28 12:41:50																																							6	6
034	Man	68	2017-10-26 13:55:57	6	2017-10-26 14:27:49	2017-10-26 17:18:16	2017-10-26 17:29:42	2017-10-26 21:27:41	2017-10-27 05:54:38	2017-10-27 08:50:27																																						2	1
035	Man	29	2017-10-26 16:14:31	10	2017-10-26 17:57:37	2017-10-26 19:18:07	2017-10-26 20:53:53	2017-10-26 21:11:07	2017-10-26 21:11:58	2017-10-26 22:20:53	2017-10-27 02:40:26	2017-10-27 05:11:14	2017-10-27 08:17:58	2017-10-27 11:55:55																																		4	6
036	Man	50	2017-10-27 11:10:37	13	2017-10-27 12:46:09	2017-10-27 17:46:25	2017-10-27 22:32:42	2017-10-28 08:29:30	2017-10-28 12:40:37	2017-10-28 18:17:27	2017-10-28 20:48:24	2017-10-28 22:27:06	2017-10-29 08:40:58	2017-10-29 12:36:55	2017-10-29 17:35:30	2017-10-29 22:10:29	2017-10-30 08:07:13																															4	1
037	Vrouw	52	2017-10-27 05:56:46	3	2017-10-27 06:58:04	2017-10-27 08:04:18	2017-10-27 17:58:05																																									2	3
038	Vrouw	52	2017-10-27 16:34:57	5	2017-10-27 22:31:14	2017-10-28 08:31:41	2017-10-28 12:15:59	2017-10-28 12:31:27	2017-10-28 17:43:09																																							3	2
039	Vrouw	68	2017-10-31 14:59:51	9	2017-10-31 17:20:49	2017-10-31 21:04:12	2017-11-01 13:28:48	2017-11-01 16:43:25	2017-11-01 16:43:37	2017-11-01 19:56:53	2017-11-01 19:57:14	2017-11-02 08:22:27	2017-11-02 10:24:48																																			3	3
040	Vrouw	55	2017-11-01 15:48:07	10	2017-11-02 05:54:28	2017-11-02 08:32:26	2017-11-02 10:04:50	2017-11-02 11:04:52	2017-11-02 11:47:13	2017-11-02 17:35:45	2017-11-02 21:22:28	2017-11-03 06:40:01	2017-11-03 08:28:23	2017-11-03 08:29:22																																		3	3
041	Vrouw	37	2017-11-01 17:23:36	1	2017-11-02 01:02:23																																											3
042	Man	49	2017-10-31 12:50:35	8	2017-10-31 13:55:55	2017-10-31 14:12:17	2017-10-31 16:34:37	2017-10-31 17:25:21	2017-10-31 21:25:30	2017-10-31 21:26:22	2017-11-01 08:01:52	2017-11-01 10:54:11																																				6	7
043	Man	39	2017-11-01 13:57:27	5	2017-11-01 21:31:04	2017-11-01 21:47:56	2017-11-02 05:21:40	2017-11-02 08:09:35	2017-11-02 08:57:28																																							2	2
044
045	Vrouw	57	2017-11-06 15:59:21	8	2017-11-06 17:13:16	2017-11-06 21:27:27	2017-11-06 21:28:21	2017-11-06 21:29:35	2017-11-07 00:30:52	2017-11-07 07:07:22	2017-11-07 08:08:14	2017-11-07 08:11:43																																				8	4
046	Vrouw	26	2017-11-03 05:50:18	3	2017-11-03 06:19:35	2017-11-03 08:14:59	2017-11-03 18:00:42																																									4	3
047	Vrouw	57	2017-11-03 17:08:47	10	2017-11-03 21:00:10	2017-11-04 16:51:54	2017-11-04 16:52:09	2017-11-04 20:31:18	2017-11-05 06:06:31	2017-11-05 07:19:15	2017-11-05 14:49:21	2017-11-05 17:28:39	2017-11-05 17:29:07	2017-11-05 21:57:55																																		5	3
048	Vrouw	25	2017-11-02 14:58:46	7	2017-11-02 17:26:21	2017-11-02 17:29:40	2017-11-03 08:22:37	2017-11-03 18:12:13	2017-11-04 08:37:19	2017-11-04 17:32:21	2017-11-04 17:32:34																																					4	4
049
050	Vrouw	65	2017-11-02 11:43:03	19	2017-11-02 12:19:35	2017-11-02 20:53:12	2017-11-02 20:53:48	2017-11-02 20:53:48	2017-11-02 23:25:28	2017-11-03 05:28:48	2017-11-03 07:05:35	2017-11-03 07:29:15	2017-11-03 09:02:38	2017-11-03 12:12:21	2017-11-03 12:13:23	2017-11-03 18:03:45	2017-11-04 03:33:10	2017-11-04 07:55:40	2017-11-04 08:27:33	2017-11-04 14:37:43	2017-11-04 17:15:36	2017-11-04 18:49:08	2017-11-04 20:12:37																									3	2
051	Vrouw	28	2017-11-06 15:12:56	4	2017-11-06 16:54:09	2017-11-06 17:09:39	2017-11-06 21:15:24	2017-11-07 17:02:29																																								4	6
052	Man	65	2017-11-06 19:39:32	3	2017-11-07 07:12:01	2017-11-07 08:29:27	2017-11-07 11:21:35																																									4	4
[truncated: 41 more columns]

## Sheet: Pain app recordings Patient
Pt001	Rust	6	2017-10-04 16:37:47	2017-10-04 16:37:48	Is de pijn dragelijk?	Ja	Extra pijnstilling nodig?	Ja	Contact verpleegkundige?	Ja
Pt001	Beweging	4	2017-10-04 19:48:53	2017-10-04 19:48:54	Is de pijn dragelijk?	Nee	Extra pijnstilling nodig?	Ja	Contact verpleegkundige?	Ja
Pt001	Rust	8	2017-10-04 19:49:35	2017-10-04 19:49:35	Is de pijn dragelijk?	Nee	Extra pijnstilling nodig?	Ja	Contact verpleegkundige?	Ja
Pt001	Beweging	7	2017-10-05 07:09:03	2017-10-05 07:09:04	Is de pijn dragelijk?	Nee	Extra pijnstilling nodig?	Ja	Contact verpleegkundige?	Ja
Pt001	Rust	4	2017-10-05 10:25:22	2017-10-05 10:25:23	Is de pijn dragelijk?	Ja	Extra pijnstilling nodig?	Nee	Contact verpleegkundige?	Ja
Pt001	Beweging	5	2017-10-05 11:40:42	2017-10-05 11:40:43	Is de pijn dragelijk?	Nee	Extra pijnstilling nodig?	Ja	Contact verpleegkundige?	Ja
Pt001	Beweging	8	2017-10-06 00:11:18	2017-10-06 00:11:19	Is de pijn dragelijk?	Nee	Extra pijnstilling nodig?	Nee	Contact verpleegkundige?	Ja
Pt001	Rust	5	2017-10-06 00:12:10	2017-10-06 00:12:11	Is de pijn dragelijk?	Ja	Extra pijnstilling nodig?	Nee	Contact verpleegkundige?	Nee
Pt001	Rust	9	2017-10-06 02:17:17	2017-10-06 02:17:18	Is de pijn dragelijk?	Nee	Extra pijnstilling nodig?	Ja	Contact verpleegkundige?	Ja
Pt001	Beweging	5	2017-10-06 06:42:14	2017-10-06 06:42:15	Is de pijn dragelijk?	Nee	Extra pijnstilling nodig?	Ja	Contact verpleegkundige?	Ja
Pt001	Rust	6	2017-10-06 08:15:07	2017-10-06 08:15:08	Is de pijn dragelijk?	Ja	Extra pijnstilling nodig?	Nee	Contact verpleegkundige?	Ja
Pt001	Rust	5	2017-10-06 09:16:57	2017-10-06 09:16:58	Is de pijn dragelijk?	Ja	Extra pijnstilling nodig?	Nee	Contact verpleegkundige?	Ja
Pt002	Beweging	6	2017-10-04 20:24:24	2017-10-04 20:24:24	Is de pijn dragelijk?	Ja	Extra pijnstilling nodig?	Nee	Contact verpleegkundige?	Nee
Pt002	Rust	7	2017-10-04 21:15:22	2017-10-04 21:15:21	Is de pijn dragelijk?	Ja	Extra pijnstilling nodig?	Nee	Contact verpleegkundige?	Nee
Pt002	Rust	6	2017-10-04 23:49:12	2017-10-04 23:49:12	Is de pijn dragelijk?	Ja	Extra pijnstilling nodig?	Nee	Contact verpleegkundige?	Nee
Pt002	Rust	6	2017-10-05 04:17:40	2017-10-05 04:17:39	Is de pijn dragelijk?	Ja	Extra pijnstilling nodig?	Nee	Contact verpleegkundige?	Nee
Pt002	Rust	4	2017-10-05 06:22:08	2017-10-05 06:22:07	Is de pijn dragelijk?	Ja	Extra pijnstilling nodig?	Nee	Contact verpleegkundige?	Nee
Pt002	Beweging	4	2017-10-05 10:19:26	2017-10-05 10:19:25	Is de pijn dragelijk?	Ja	Extra pijnstilling nodig?	Nee	Contact verpleegkundige?	Nee
Pt002	Beweging	3	2017-10-05 12:31:15	2017-10-05 12:31:14	Is de pijn dragelijk?	Ja	Extra pijnstilling nodig?	Nee	Contact verpleegkundige?	Nee
Pt002	Beweging	4	2017-10-05 14:47:43	2017-10-05 14:47:42	Is de pijn dragelijk?	Ja	Extra pijnstilling nodig?	Nee	Contact verpleegkundige?	Nee
Pt002	Rust	1	2017-10-05 17:06:41	2017-10-05 17:06:39	Is de pijn dragelijk?	Ja	Extra pijnstilling nodig?	Nee	Contact verpleegkundige?	Nee
Pt002	Rust	3	2017-10-05 18:46:53	2017-10-05 18:46:52	Is de pijn dragelijk?	Ja	Extra pijnstilling nodig?	Nee	Contact verpleegkundige?	Nee
Pt002	Rust	1	2017-10-05 22:29:58	2017-10-05 22:29:56	Is de pijn dragelijk?	Ja	Extra pijnstilling nodig?	Ja	Contact verpleegkundige?	Nee
Pt002	Rust	0	2017-10-06 05:03:24	2017-10-06 05:03:21	Is de pijn dragelijk?	Ja	Extra pijnstilling nodig?	Nee	Contact verpleegkundige?	Nee
Pt002	Rust	0	2017-10-06 08:40:07	2017-10-06 08:40:04	Is de pijn dragelijk?	Ja	Extra pijnstilling nodig?	Ja	Contact verpleegkundige?	Ja
Pt002	Rust	0	2017-10-06 10:39:48	2017-10-06 10:39:45	Is de pijn dragelijk?	Ja	Extra pijnstilling nodig?	Nee	Contact verpleegkundige?	Ja
Pt003	Rust	2	2017-10-09 22:03:57	2017-10-09 22:02:58	Is de pijn dragelijk?	Ja	Extra pijnstilling nodig?	Nee	Contact verpleegkundige?	Nee
Pt003	Rust	2	2017-10-10 09:00:28	2017-10-10 08:59:28	Is de pijn dragelijk?	Ja	Extra pijnstilling nodig?	Nee	Contact verpleegkundige?	Nee
Pt003	Beweging	2	2017-10-10 09:03:40	2017-10-10 09:02:40	Is de pijn dragelijk?	Ja	Extra pijnstilling nodig?	Nee	Contact verpleegkundige?	Nee
Pt004	Rust	0	2017-10-06 08:37:26	2017-10-06 08:37:25	Is de pijn dragelijk?	Ja	Extra pijnstilling nodig?	Nee	Contact verpleegkundige?	Nee
Pt005	te ziek
Pt006	Beweging	4	2017-10-06 14:34:15	2017-10-06 14:34:13	Is de pijn dragelijk?	Ja	Extra pijnstilling nodig?	Nee	Contact verpleegkundige?	Ja
Pt006	Beweging	7	2017-10-06 16:05:16	2017-10-06 16:05:14	Is de pijn dragelijk?	Ja	Extra pijnstilling nodig?	Ja	Contact verpleegkundige?	Ja
Pt006	Rust	2	2017-10-07 09:31:23	2017-10-07 09:31:20	Is de pijn dragelijk?	Ja	Extra pijnstilling nodig?	Nee	Contact verpleegkundige?	Nee
Pt007	te ziek
Pt008	Beweging	3	2017-10-10 18:20:52	2017-10-10 18:20:53	Is de pijn dragelijk?	Ja	Extra pijnstilling nodig?	Nee	Contact verpleegkundige?	Nee
Pt008	Rust	3	2017-10-10 18:20:29	2017-10-10 18:20:29	Is de pijn dragelijk?	Nee	Extra pijnstilling nodig?	Nee	Contact verpleegkundige?	Nee
Pt008	Rust	1	2017-10-10 09:29:20	2017-10-10 09:29:20	Is de pijn dragelijk?	Ja	Extra pijnstilling nodig?	Nee	Contact verpleegkundige?	Nee
Pt008	Beweging	3	2017-10-10 09:28:54	2017-10-10 09:28:54	Is de pijn dragelijk?	Ja	Extra pijnstilling nodig?	Nee	Contact verpleegkundige?	Nee
Pt008	Beweging	1	2017-10-09 21:48:30	2017-10-09 21:48:30	Is de pijn dragelijk?	Ja	Extra pijnstilling nodig?	Nee	Contact verpleegkundige?	Nee
Pt008	Rust	1	2017-10-09 21:48:06	2017-10-09 21:48:06	Is de pijn dragelijk?	Ja	Extra pijnstilling nodig?	Nee	Contact verpleegkundige?	Nee
Pt009	Beweging	8	2017-10-09 15:58:39	2017-10-09 15:58:49	Is de pijn dragelijk?	Ja	Extra pijnstilling nodig?	Nee	Contact verpleegkundige?	Nee
Pt009	Rust	9	2017-10-09 17:33:15	2017-10-09 17:33:25	Is de pijn dragelijk?	Ja	Extra pijnstilling nodig?	Nee	Contact verpleegkundige?	Nee
Pt009	Rust	8	2017-10-09 21:40:08	2017-10-09 21:40:18	Is de pijn dragelijk?	Ja	Extra pijnstilling nodig?	Ja	Contact verpleegkundige?	Nee
Pt009	Rust	7	2017-10-10 08:54:56	2017-10-10 08:55:07	Is de pijn dragelijk?	Ja	Extra pijnstilling nodig?	Ja	Contact verpleegkundige?	Nee
Pt009	Beweging	7	2017-10-10 11:24:02	2017-10-10 11:24:13	Is de pijn dragelijk?	Ja	Extra pijnstilling nodig?	Ja	Contact verpleegkundige?	Nee
Pt009	Rust	5	2017-10-10 13:06:07	2017-10-10 13:06:17	Is de pijn dragelijk?	Ja	Extra pijnstilling nodig?	Nee	Contact verpleegkundige?	Nee
Pt009	Rust	5	2017-10-10 19:38:24	2017-10-10 19:38:34	Is de pijn dragelijk?	Nee	Extra pijnstilling nodig?	Nee	Contact verpleegkundige?	Nee
Pt009	Beweging	4	2017-10-11 08:50:09	2017-10-11 08:50:19	Is de pijn dragelijk?	Nee	Extra pijnstilling nodig?	Nee	Contact verpleegkundige?	Nee
Pt009	Rust	4	2017-10-11 12:10:44	2017-10-11 12:10:54	Is de pijn dragelijk?	Ja	Extra pijnstilling nodig?	Nee	Contact verpleegkundige?	Ja
Pt009	Rust	3	2017-10-12 07:43:53	2017-10-12 07:44:03	Is de pijn dragelijk?	Nee	Extra pijnstilling nodig?	Nee	Contact verpleegkundige?	Nee
Pt010	Rust	0	2017-10-11 10:15:15	2017-10-11 10:15:15	Is de pijn dragelijk?	Nee	Extra pijnstilling nodig?	Ja	Contact verpleegkundige?	Ja
Pt010	Beweging	3	2017-10-12 08:34:36	2017-10-12 08:34:35	Is de pijn dragelijk?	Ja	Extra pijnstilling nodig?	Ja	Contact verpleegkundige?	Ja
Pt010	Rust	3	2017-10-12 10:03:38	2017-10-12 10:03:37	Is de pijn dragelijk?	Ja	Extra pijnstilling nodig?	Nee	Contact verpleegkundige?	Ja
Pt010	Rust	4	2017-10-13 00:46:45	2017-10-13 00:46:45	Is de pijn dragelijk?	Ja	Extra pijnstilling nodig?	Ja	Contact verpleegkundige?	Ja
pt011	Beweging	4	2017-10-11 17:15:56	2017-10-11 17:15:57	Is de pijn dragelijk?	Ja	Extra pijnstilling nodig?	Nee	Contact verpleegkundige?	Nee
pt011	Beweging	4	2017-10-11 18:36:28	2017-10-11 18:36:29	Is de pijn dragelijk?	Ja	Extra pijnstilling nodig?	Nee	Contact verpleegkundige?	Nee
pt011	Beweging	4	2017-10-11 20:59:53	2017-10-11 20:59:54	Is de pijn dragelijk?	Ja	Extra pijnstilling nodig?	Nee	Contact verpleegkundige?	Nee
pt011	Beweging	4	2017-10-11 22:44:24	2017-10-11 22:44:25	Is de pijn dragelijk?	Ja	Extra pijnstilling nodig?	Ja	Contact verpleegkundige?	Nee
pt011	Beweging	3	2017-10-12 03:34:09	2017-10-12 03:34:10	Is de pijn dragelijk?	Ja	Extra pijnstilling nodig?	Nee	Contact verpleegkundige?	Nee
pt011	Rust	3	2017-10-12 07:51:55	2017-10-12 07:51:56	Is de pijn dragelijk?	Ja	Extra pijnstilling nodig?	Nee	Contact verpleegkundige?	Nee
pt011	Rust	2	2017-10-12 10:28:58	2017-10-12 10:28:59	Is de pijn dragelijk?	Ja	Extra pijnstilling nodig?	Nee	Contact verpleegkundige?	Nee
pt011	Rust	2	2017-10-12 11:46:38	2017-10-12 11:46:39	Is de pijn dragelijk?	Ja	Extra pijnstilling nodig?	Nee	Contact verpleegkundige?	Nee
pt011	Rust	1	2017-10-12 15:31:59	2017-10-12 15:32:00	Is de pijn dragelijk?	Ja	Extra pijnstilling nodig?	Nee	Contact verpleegkundige?	Nee
pt011	Rust	1	2017-10-12 17:02:00	2017-10-12 17:02:02	Is de pijn dragelijk?	Ja	Extra pijnstilling nodig?	Nee	Contact verpleegkundige?	Nee
pt011	Rust	1	2017-10-12 23:07:33	2017-10-12 23:07:34	Is de pijn dragelijk?	Ja	Extra pijnstilling nodig?	Nee	Contact verpleegkundige?	Nee
pt011	Rust	1	2017-10-13 08:53:36	2017-10-13 08:53:37	Is de pijn dragelijk?	Ja	Extra pijnstilling nodig?	Nee	Contact verpleegkundige?	Nee
Pt012	Beweging	4	2017-10-12 11:16:46	2017-10-12 11:16:40	Is de pijn dragelijk?	Ja	Extra pijnstilling nodig?	Ja	Contact verpleegkundige?	Ja
Pt012	Rust	3	2017-10-12 15:15:54	2017-10-12 15:15:48	Is de pijn dragelijk?	Ja	Extra pijnstilling nodig?	Ja	Contact verpleegkundige?	Ja
Pt012	Rust	5	2017-10-12 19:33:11	2017-10-12 19:33:05	Is de pijn dragelijk?	Nee	Extra pijnstilling nodig?	Ja	Contact verpleegkundige?	Ja
Pt012	Rust	4	2017-10-12 21:34:00	2017-10-12 21:33:59	Is de pijn dragelijk?	Ja	Extra pijnstilling nodig?	Ja	Contact verpleegkundige?	Ja
Pt012	Rust	6	2017-10-13 10:32:57	2017-10-13 10:32:57	Is de pijn dragelijk?	Nee	Extra pijnstilling nodig?	Ja	Contact verpleegkundige?	Ja
Pt012	Beweging	7	2017-10-13 12:38:51	2017-10-13 12:38:52	Is de pijn dragelijk?	Ja	Extra pijnstilling nodig?	Ja	Contact verpleegkundige?	Nee
Pt012	Rust	7	2017-10-13 21:52:27	2017-10-13 21:52:27	Is de pijn dragelijk?	Ja	Extra pijnstilling nodig?	Nee	Contact verpleegkundige?	Nee
Pt012	Beweging	8	2017-10-14 08:04:10	2017-10-14 08:04:10	Is de pijn dragelijk?	Ja	Extra pijnstilling nodig?	Nee	Contact verpleegkundige?	Nee
Pt012	Rust	6	2017-10-14 10:56:27	2017-10-14 10:56:27	Is de pijn dragelijk?	Ja	Extra pijnstilling nodig?	Nee	Contact verpleegkundige?	Nee
Pt012	Rust	7	2017-10-14 12:48:26	2017-10-14 12:48:26	Is de pijn dragelijk?	Ja	Extra pijnstilling nodig?	Nee	Contact verpleegkundige?	Nee
Pt013	Beweging	4	2017-10-12 17:54:43	2017-10-12 17:54:54	Is de pijn dragelijk?	Ja	Extra pijnstilling nodig?	Nee	Contact verpleegkundige?	Nee
Pt013	Beweging	0	2017-10-12 22:52:22	2017-10-12 22:52:34	Is de pijn dragelijk?	Ja	Extra pijnstilling nodig?	Nee	Contact verpleegkundige?	Nee
Pt013	Beweging	4	2017-10-13 05:18:57	2017-10-13 05:19:12	Is de pijn dragelijk?	Ja	Extra pijnstilling nodig?	Nee	Contact verpleegkundige?	Nee
Pt013	Beweging	7	2017-10-13 09:56:47	2017-10-13 09:57:02	Is de pijn dragelijk?	Ja	Extra pijnstilling nodig?	Nee	Contact verpleegkundige?	Nee
Pt013	Beweging	3	2017-10-13 13:28:52	2017-10-13 13:29:09	Is de pijn dragelijk?	Ja	Extra pijnstilling nodig?	Nee	Contact verpleegkundige?	Nee
Pt013	Beweging	3	2017-10-13 16:21:52	2017-10-13 16:22:09	Is de pijn dragelijk?	Ja	Extra pijnstilling nodig?	Nee	Contact verpleegkundige?	Nee
Pt013	Beweging	2	2017-10-13 18:34:42	2017-10-13 18:35:00	Is de pijn dragelijk?	Ja	Extra pijnstilling nodig?	Ja	Contact verpleegkundige?	Ja
Pt013	Beweging	2	2017-10-13 20:28:36	2017-10-13 20:28:55	Is de pijn dragelijk?	Ja	Extra pijnstilling nodig?	Nee	Contact verpleegkundige?	Nee
Pt013	Rust	1	2017-10-14 05:15:50	2017-10-14 05:16:13	Is de pijn dragelijk?	Ja	Extra pijnstilling nodig?	Nee	Contact verpleegkundige?	Nee
Pt013	Rust	1	2017-10-14 10:05:44	2017-10-14 10:06:08	Is de pijn dragelijk?	Ja	Extra pijnstilling nodig?	Ja	Contact verpleegkundige?	Nee
Pt014	Rust	5	2017-10-13 12:08:26	2017-10-13 12:08:26	Is de pijn dragelijk?	Ja	Extra pijnstilling nodig?	Ja	Contact verpleegkundige?	Nee
Pt014	Rust	3	2017-10-13 17:49:56	2017-10-13 17:49:57	Is de pijn dragelijk?	Ja	Extra pijnstilling nodig?	Nee	Contact verpleegkundige?	Nee
Pt014	Rust	6	2017-10-13 22:16:44	2017-10-13 22:16:45	Is de pijn dragelijk?	Ja	Extra pijnstilling nodig?	Nee	Contact verpleegkundige?	Nee
Pt015	Rust	3	2017-10-13 14:57:14	2017-10-13 14:57:15	Is de pijn dragelijk?	Ja	Extra pijnstilling nodig?	Nee	Contact verpleegkundige?	Nee
Pt015	Beweging	6	2017-10-13 15:12:14	2017-10-13 15:12:15	Is de pijn dragelijk?	Nee	Extra pijnstilling nodig?	Ja	Contact verpleegkundige?	Nee
Pt015	Beweging	4	2017-10-13 16:42:06	2017-10-13 16:42:07	Is de pijn dragelijk?	Ja	Extra pijnstilling nodig?	Ja	Contact verpleegkundige?	Nee
Pt015	Beweging	6	2017-10-13 20:40:39	2017-10-13 20:40:40	Is de pijn dragelijk?	Ja	Extra pijnstilling nodig?	Nee	Contact verpleegkundige?	Nee
Pt015	Beweging	5	2017-10-13 21:54:03	2017-10-13 21:54:04	Is de pijn dragelijk?	Ja	Extra pijnstilling nodig?	Nee	Contact verpleegkundige?	Ja
Pt015	Beweging	2	2017-10-14 08:05:21	2017-10-14 08:05:22	Is de pijn dragelijk?	Ja	Extra pijnstilling nodig?	Nee	Contact verpleegkundige?	Nee
Pt015	Rust	4	2017-10-14 08:23:50	2017-10-14 08:23:52	Is de pijn dragelijk?	Nee	Extra pijnstilling nodig?	Ja	Contact verpleegkundige?	Ja
Pt015	Rust	6	2017-10-14 16:29:38	2017-10-14 16:29:39	Is de pijn dragelijk?	Ja	Extra pijnstilling nodig?	Nee	Contact verpleegkundige?	Nee
Pt015	Beweging	7	2017-10-15 13:39:14	2017-10-15 13:39:14	Is de pijn dragelijk?	Ja	Extra pijnstilling nodig?	Ja	Contact verpleegkundige?	Nee
Pt015	Rust	2	2017-10-15 19:15:32	2017-10-15 19:15:32	Is de pijn dragelijk?	Ja	Extra pijnstilling nodig?	Nee	Contact verpleegkundige?	Nee
Pt016	Beweging	4	2017-10-13 13:14:08	2017-10-13 13:14:08	Is de pijn dragelijk?	Ja	Extra pijnstilling nodig?	Nee	Contact verpleegkundige?	Nee
Pt016	Beweging	4	2017-10-13 14:06:40	2017-10-13 14:06:40	Is de pijn dragelijk?	Ja	Extra pijnstilling nodig?	Nee	Contact verpleegkundige?	Nee
Pt016	Rust	4	2017-10-13 15:05:15	2017-10-13 15:05:15	Is de pijn dragelijk?	Ja	Extra pijnstilling nodig?	Nee	Contact verpleegkundige?	Nee
Pt016	Rust	3	2017-10-13 16:56:24	2017-10-13 16:56:24	Is de pijn dragelijk?	Ja	Extra pijnstilling nodig?	Nee	Contact verpleegkundige?	Nee
Pt016	Rust	4	2017-10-13 18:29:23	2017-10-13 18:29:23	Is de pijn dragelijk?	Ja	Extra pijnstilling nodig?	Nee	Contact verpleegkundige?	Nee
Pt016	Rust	5	2017-10-14 02:06:43	2017-10-14 02:06:44	Is de pijn dragelijk?	Ja	Extra pijnstilling nodig?	Nee	Contact verpleegkundige?	Nee
Pt016	Rust	1	2017-10-14 04:53:14	2017-10-14 04:53:15	Is de pijn dragelijk?	Ja	Extra pijnstilling nodig?	Nee	Contact verpleegkundige?	Nee
Pt016	Rust	1	2017-10-14 09:29:23	2017-10-14 09:29:24	Is de pijn dragelijk?	Ja	Extra pijnstilling nodig?	Nee	Contact verpleegkundige?	Nee
Pt016	Rust	2	2017-10-14 14:16:03	2017-10-14 14:16:04	Is de pijn dragelijk?	Ja	Extra pijnstilling nodig?	Nee	Contact verpleegkundige?	Nee
Pt017	Rust	3	2017-10-16 20:05:29	2017-10-16 20:05:29	Is de pijn dragelijk?	Ja	Extra pijnstilling nodig?	Nee	Contact verpleegkundige?	Nee
Pt017	Rust	2	2017-10-16 22:18:58	2017-10-16 22:18:57	Is de pijn dragelijk?	Ja	Extra pijnstilling nodig?	Nee	Contact verpleegkundige?	Nee
Pt017	Rust	3	2017-10-17 10:34:03	2017-10-17 10:34:04	Is de pijn dragelijk?	Ja	Extra pijnstilling nodig?	Nee	Contact verpleegkundige?	Nee
Pt017	Rust	2	2017-10-17 12:07:11	2017-10-17 12:07:11	Is de pijn dragelijk?	Ja	Extra pijnstilling nodig?	Nee	Contact verpleegkundige?	Nee
Pt018	Rust	3	2017-10-16 15:49:04	2017-10-16 15:49:05	Is de pijn dragelijk?	Ja	Extra pijnstilling nodig?	Nee	Contact verpleegkundige?	Nee
Pt018	Rust	2	2017-10-16 17:06:40	2017-10-16 17:06:41	Is de pijn dragelijk?	Ja	Extra pijnstilling nodig?	Nee	Contact verpleegkundige?	Nee
Pt018	Beweging	5	2017-10-16 22:45:15	2017-10-16 22:45:16	Is de pijn dragelijk?	Ja	Extra pijnstilling nodig?	Nee	Contact verpleegkundige?	Nee
Pt018	Beweging	6	2017-10-17 08:08:12	2017-10-17 08:08:12	Is de pijn dragelijk?	Ja	Extra pijnstilling nodig?	Nee	Contact verpleegkundige?	Nee
Pt018	Rust	6	2017-10-17 08:22:23	2017-10-17 08:22:23	Is de pijn dragelijk?	Ja	Extra pijnstilling nodig?	Ja	Contact verpleegkundige?	Nee
Pt018	Rust	4	2017-10-17 12:51:21	2017-10-17 12:51:22	Is de pijn dragelijk?	Ja	Extra pijnstilling nodig?	Ja	Contact verpleegkundige?	Nee
Pt018	Beweging	3	2017-10-17 17:18:01	2017-10-17 17:18:02	Is de pijn dragelijk?	Ja	Extra pijnstilling nodig?	Nee	Contact verpleegkundige?	Nee
Pt018	Rust	2	2017-10-17 22:30:19	2017-10-17 22:30:20	Is de pijn dragelijk?	Ja	Extra pijnstilling nodig?	Nee	Contact verpleegkundige?	Nee
Pt019	Rust	8	2017-10-16 18:00:19	2017-10-16 18:00:37	Is de pijn dragelijk?	Ja	Extra pijnstilling nodig?	Ja	Contact verpleegkundige?	Nee
Pt019	Beweging	4	2017-10-16 22:01:14	2017-10-16 22:01:32	Is de pijn dragelijk?	Ja	Extra pijnstilling nodig?	Ja	Contact verpleegkundige?	Nee
Pt019	Beweging	6	2017-10-17 10:11:32	2017-10-17 10:11:50	Is de pijn dragelijk?	Ja	Extra pijnstilling nodig?	Ja	Contact verpleegkundige?	Nee
Pt019	Rust	3	2017-10-17 13:40:51	2017-10-17 13:41:09	Is de pijn dragelijk?	Ja	Extra pijnstilling nodig?	Ja	Contact verpleegkundige?	Nee
Pt019	Rust	3	2017-10-17 17:17:54	2017-10-17 17:18:11	Is de pijn dragelijk?	Ja	Extra pijnstilling nodig?	Ja	Contact verpleegkundige?	Nee
Pt020	Rust	7	2017-10-18 01:33:20	2017-10-18 01:33:20	Is de pijn dragelijk?	Nee	Extra pijnstilling nodig?	Ja	Contact verpleegkundige?	Nee
Pt020	Rust	8	2017-10-18 08:23:18	2017-10-18 08:23:19	Is de pijn dragelijk?	Ja	Extra pijnstilling nodig?	Ja	Contact verpleegkundige?	Nee
Pt021	Rust	2	2017-10-19 18:45:57	2017-10-19 18:45:58	Is de pijn dragelijk?	Ja	Extra pijnstilling nodig?	Nee	Contact verpleegkundige?	Nee
Pt021	Beweging	5	2017-10-19 22:10:36	2017-10-19 22:10:37	Is de pijn dragelijk?	Ja	Extra pijnstilling nodig?	Ja	Contact verpleegkundige?	Ja
Pt021	Rust	5	2017-10-20 08:22:25	2017-10-20 08:22:26	Is de pijn dragelijk?	Ja	Extra pijnstilling nodig?	Ja	Contact verpleegkundige?	Nee
Pt021	Beweging	6	2017-10-20 09:41:42	2017-10-20 09:41:42	Is de pijn dragelijk?	Ja	Extra pijnstilling nodig?	Ja	Contact verpleegkundige?	Ja
Pt021	Rust	3	2017-10-20 12:43:12	2017-10-20 12:43:14	Is de pijn dragelijk?	Ja	Extra pijnstilling nodig?	Nee	Contact verpleegkundige?	Nee
Pt021	Rust	4	2017-10-20 18:24:47	2017-10-20 18:24:48	Is de pijn dragelijk?	Nee	Extra pijnstilling nodig?	Ja	Contact verpleegkundige?	Ja
Pt022	Beweging	4	2017-10-19 16:10:47	2017-10-19 16:10:47	Is de pijn dragelijk?	Ja	Extra pijnstilling nodig?	Nee	Contact verpleegkundige?	Nee
Pt022	Rust	3	2017-10-20 08:02:39	2017-10-20 08:02:38	Is de pijn dragelijk?	Ja	Extra pijnstilling nodig?	Nee	Contact verpleegkundige?	Nee
Pt022	Rust	3	2017-10-20 13:05:21	2017-10-20 13:05:20	Is de pijn dragelijk?	Ja	Extra pijnstilling nodig?	Nee	Contact verpleegkundige?	Nee
Pt022	Rust	2	2017-10-20 17:01:57	2017-10-20 17:01:55	Is de pijn dragelijk?	Ja	Extra pijnstilling nodig?	Nee	Contact verpleegkundige?	Nee
Pt022	Rust	1	2017-10-21 07:21:09	2017-10-21 07:21:09	Is de pijn dragelijk?	Ja	Extra pijnstilling nodig?	Nee	Contact verpleegkundige?	Nee
Pt024	Rust	2	2017-10-23 20:32:56	2017-10-23 20:33:03	Is de pijn dragelijk?	Ja	Extra pijnstilling nodig?	Nee	Contact verpleegkundige?	Nee
Pt024	Beweging	2	2017-10-23 22:00:53	2017-10-23 22:01:01	Is de pijn dragelijk?	Ja	Extra pijnstilling nodig?	Nee	Contact verpleegkundige?	Nee
Pt024	Beweging	2	2017-10-24 09:19:13	2017-10-24 09:19:23	Is de pijn dragelijk?	Ja	Extra pijnstilling nodig?	Nee	Contact verpleegkundige?	Nee
Pt024	Rust	1	2017-10-24 12:30:15	2017-10-24 12:30:26	Is de pijn dragelijk?	Ja	Extra pijnstilling nodig?	Nee	Contact verpleegkundige?	Nee
Pt024	Rust	1	2017-10-24 17:00:43	2017-10-24 17:00:54	Is de pijn dragelijk?	Ja	Extra pijnstilling nodig?	Nee	Contact verpleegkundige?	Nee
Pt024	Rust	1	2017-10-25 09:16:51	2017-10-25 09:17:06	Is de pijn dragelijk?	Ja	Extra pijnstilling nodig?	Nee	Contact verpleegkundige?	Nee
Pt025	Rust	0	2017-10-23 17:47:34	2017-10-23 17:47:34	Is de pijn dragelijk?	Ja	Extra pijnstilling nodig?	Ja	Contact verpleegkundige?	Ja
Pt025	Rust	4	2017-10-27 10:54:35	2017-10-27 10:54:32	Is de pijn dragelijk?	Ja	Extra pijnstilling nodig?	Nee	Contact verpleegkundige?	Nee
Pt026	Beweging	7	2017-10-19 22:26:20	2017-10-19 22:26:22	Is de pijn dragelijk?	Ja	Extra pijnstilling nodig?	Ja	Contact verpleegkundige?	Ja
Pt026	Beweging	5	2017-10-20 09:28:08	2017-10-20 09:28:11	Is de pijn dragelijk?	Ja	Extra pijnstilling nodig?	Ja	Contact verpleegkundige?	Ja
Pt026	Beweging	7	2017-10-20 13:18:54	2017-10-20 13:18:57	Is de pijn dragelijk?	Ja	Extra pijnstilling nodig?	Ja	Contact verpleegkundige?	Ja
Pt026	Beweging	4	2017-10-20 17:00:35	2017-10-20 17:00:38	Is de pijn dragelijk?	Ja	Extra pijnstilling nodig?	Ja	Contact verpleegkundige?	Ja
Pt026	Beweging	6	2017-10-20 22:29:25	2017-10-20 22:29:28	Is de pijn dragelijk?	Ja	Extra pijnstilling nodig?	Nee	Contact verpleegkundige?	Nee
Pt027	Rust	8	2017-10-20 14:30:28	2017-10-20 14:30:28	Is de pijn dragelijk?	Nee	Extra pijnstilling nodig?	Ja	Contact verpleegkundige?	Ja
Pt027	Rust	7	2017-10-20 16:11:41	2017-10-20 16:11:40	Is de pijn dragelijk?	Ja	Extra pijnstilling nodig?	Nee	Contact verpleegkundige?	Nee
Pt027	Rust	7	2017-10-20 18:11:05	2017-10-20 18:11:05	Is de pijn dragelijk?	Ja	Extra pijnstilling nodig?	Nee	Contact verpleegkundige?	Nee
Pt027	Rust	8	2017-10-20 19:08:13	2017-10-20 19:08:13	Is de pijn dragelijk?	Ja	Extra pijnstilling nodig?	Nee	Contact verpleegkundige?	Nee
Pt027	Rust	6	2017-10-20 20:38:56	2017-10-20 20:38:56	Is de pijn dragelijk?	Ja	Extra pijnstilling nodig?	Nee	Contact verpleegkundige?	Nee
Pt027	Rust	5	2017-10-20 22:34:59	2017-10-20 22:34:59	Is de pijn dragelijk?	Ja	Extra pijnstilling nodig?	Ja	Contact verpleegkundige?	Nee
Pt027	Rust	7	2017-10-21 00:18:03	2017-10-21 00:18:03	Is de pijn dragelijk?	Ja	Extra pijnstilling nodig?	Nee	Contact verpleegkundige?	Nee
Pt027	Beweging	6	2017-10-21 12:13:00	2017-10-21 12:13:00	Is de pijn dragelijk?	Ja	Extra pijnstilling nodig?	Nee	Contact verpleegkundige?	Nee
Pt027	Beweging	5	2017-10-21 17:23:03	2017-10-21 17:23:03	Is de pijn dragelijk?	Ja	Extra pijnstilling nodig?	Ja	Contact verpleegkundige?	Nee
Pt027	Rust	3	2017-10-21 21:30:56	2017-10-21 21:30:56	Is de pijn dragelijk?	Ja	Extra pijnstilling nodig?	Ja	Contact verpleegkundige?	Nee
Pt027	Rust	5	2017-10-22 00:22:27	2017-10-22 00:22:27	Is de pijn dragelijk?	Ja	Extra pijnstilling nodig?	Nee	Contact verpleegkundige?	Nee
Pt027	Rust	7	2017-10-22 03:18:25	2017-10-22 03:18:25	Is de pijn dragelijk?	Ja	Extra pijnstilling nodig?	Nee	Contact verpleegkundige?	Nee
Pt027	Beweging	7	2017-10-22 06:44:29	2017-10-22 06:44:29	Is de pijn dragelijk?	Ja	Extra pijnstilling nodig?	Nee	Contact verpleegkundige?	Nee
Pt028	Rust	5	2017-10-24 17:42:12	2017-10-24 17:42:13	Is de pijn dragelijk?	Ja	Extra pijnstilling nodig?	Nee	Contact verpleegkundige?	Nee
Pt028	Rust	4	2017-10-24 20:10:59	2017-10-24 20:10:59	Is de pijn dragelijk?	Ja	Extra pijnstilling nodig?	Nee	Contact verpleegkundige?	Nee
Pt028	Beweging	4	2017-10-25 12:21:24	2017-10-25 12:21:25	Is de pijn dragelijk?	Ja	Extra pijnstilling nodig?	Nee	Contact verpleegkundige?	Ja
Pt029	Rust	5	2017-10-23 20:49:56	2017-10-23 20:49:59	Is de pijn dragelijk?	Ja	Extra pijnstilling nodig?	Nee	Contact verpleegkundige?	Nee
Pt029	Rust	5	2017-10-24 05:07:34	2017-10-24 05:07:34	Is de pijn dragelijk?	Ja	Extra pijnstilling nodig?	Nee	Contact verpleegkundige?	Nee
Pt029	Rust	6	2017-10-24 08:39:29	2017-10-24 08:39:30	Is de pijn dragelijk?	Ja	Extra pijnstilling nodig?	Nee	Contact verpleegkundige?	Nee
Pt029	Rust	3	2017-10-24 12:15:25	2017-10-24 12:15:26	Is de pijn dragelijk?	Nee	Extra pijnstilling nodig?	Ja	Contact verpleegkundige?	Nee
Pt029	Beweging	3	2017-10-24 17:09:59	2017-10-24 17:10:00	Is de pijn dragelijk?	Ja	Extra pijnstilling nodig?	Nee	Contact verpleegkundige?	Nee
Pt029	Rust	4	2017-10-25 06:43:06	2017-10-25 06:43:08	Is de pijn dragelijk?	Nee	Extra pijnstilling nodig?	Ja	Contact verpleegkundige?	Nee
Pt030	Rust	7	2017-10-24 20:04:00	2017-10-24 20:03:59	Is de pijn dragelijk?	Ja	Extra pijnstilling nodig?	Nee	Contact verpleegkundige?	Nee
Pt030	Rust	5	2017-10-24 22:00:47	2017-10-24 22:00:46	Is de pijn dragelijk?	Ja	Extra pijnstilling nodig?	Nee	Contact verpleegkundige?	Nee
Pt030	Rust	8	2017-10-25 08:23:56	2017-10-25 08:23:56	Is de pijn dragelijk?	Ja	Extra pijnstilling nodig?	Nee	Contact verpleegkundige?	Nee
Pt030	Rust	4	2017-10-25 12:09:47	2017-10-25 12:09:47	Is de pijn dragelijk?	Ja	Extra pijnstilling nodig?	Nee	Contact verpleegkundige?	Nee
Pt031	Rust	7	2017-10-24 18:18:48	2017-10-24 18:18:49	Is de pijn dragelijk?	Ja	Extra pijnstilling nodig?	Nee	Contact verpleegkundige?	Nee
Pt031	Rust	7	2017-10-24 18:19:55	2017-10-24 18:19:55	Is de pijn dragelijk?	Ja	Extra pijnstilling nodig?	Nee	Contact verpleegkundige?	Nee
Pt031	Rust	6	2017-10-25 06:50:45	2017-10-25 06:50:45	Is de pijn dragelijk?	Ja	Extra pijnstilling nodig?	Nee	Contact verpleegkundige?	Nee
Pt031	Rust	6	2017-10-25 20:52:52	2017-10-25 20:52:52	Is de pijn dragelijk?	Ja	Extra pijnstilling nodig?	Nee	Contact verpleegkundige?	Nee
Pt032	Beweging	9	2017-10-24 17:43:01	2017-10-24 17:43:03	Is de pijn dragelijk?	Ja	Extra pijnstilling nodig?	Nee	Contact verpleegkundige?	Nee
Pt032	Beweging	7	2017-10-24 22:39:47	2017-10-24 22:39:48	Is de pijn dragelijk?	Ja	Extra pijnstilling nodig?	Nee	Contact verpleegkundige?	Nee
Pt032	Beweging	7	2017-10-25 06:32:52	2017-10-25 06:32:53	Is de pijn dragelijk?	Ja	Extra pijnstilling nodig?	Ja	Contact verpleegkundige?	Ja
Pt032	Rust	7	2017-10-25 06:32:54	2017-10-25 06:32:54	Is de pijn dragelijk?	Nee	Extra pijnstilling nodig?	Ja	Contact verpleegkundige?	Ja
Pt032	Beweging	6	2017-10-25 12:44:08	2017-10-25 12:44:10	Is de pijn dragelijk?	Ja	Extra pijnstilling nodig?	Nee	Contact verpleegkundige?	Ja
Pt033	Rust	1	2017-10-29 20:06:30	2017-10-29 20:05:10	Is de pijn dragelijk?	Nee	Extra pijnstilling nodig?	Ja	Contact verpleegkundige?	Nee
Pt033	Rust	6	2017-10-29 20:07:06	2017-10-29 20:05:45	Is de pijn dragelijk?	Ja	Extra pijnstilling nodig?	Ja	Contact verpleegkundige?	Nee
Pt033	Rust	5	2017-10-30 00:15:31	2017-10-30 00:14:10	Is de pijn dragelijk?	Ja	Extra pijnstilling nodig?	Nee	Contact verpleegkundige?	Ja
Pt034	Rust	0	2017-10-26 14:13:52	2017-10-26 14:18:04	Is de pijn dragelijk?	Ja	Extra pijnstilling nodig?	Nee	Contact verpleegkundige?	Nee
Pt034	Beweging	0	2017-10-26 19:43:43	2017-10-26 19:47:56	Is de pijn dragelijk?	Ja	Extra pijnstilling nodig?	Nee	Contact verpleegkundige?	Nee
Pt034	Rust	0	2017-10-27 09:36:16	2017-10-27 09:40:29	Is de pijn dragelijk?	Ja	Extra pijnstilling nodig?	Nee	Contact verpleegkundige?	Nee
Pt034	Rust	0	2017-10-27 19:13:30	2017-10-27 19:17:42	Is de pijn dragelijk?	Ja	Extra pijnstilling nodig?	Nee	Contact verpleegkundige?	Nee
Pt035	Rust	4	2017-10-26 16:49:45	2017-10-26 16:49:46	Is de pijn dragelijk?	Ja	Extra pijnstilling nodig?	Ja	Contact verpleegkundige?	Nee
Pt035	Rust	4	2017-10-26 17:28:56	2017-10-26 17:28:57	Is de pijn dragelijk?	Ja	Extra pijnstilling nodig?	Nee	Contact verpleegkundige?	Nee
Pt035	Rust	6	2017-10-26 19:31:04	2017-10-26 19:31:05	Is de pijn dragelijk?	Ja	Extra pijnstilling nodig?	Nee	Contact verpleegkundige?	Nee
Pt035	Rust	7	2017-10-26 21:55:07	2017-10-26 21:55:07	Is de pijn dragelijk?	Ja	Extra pijnstilling nodig?	Nee	Contact verpleegkundige?	Nee
Pt035	Rust	5	2017-10-27 12:01:01	2017-10-27 12:01:01	Is de pijn dragelijk?	Ja	Extra pijnstilling nodig?	Nee	Contact verpleegkundige?	Nee
Pt036	Rust	4	2017-10-30 08:22:35	2017-10-30 08:22:36	Is de pijn dragelijk?	Ja	Extra pijnstilling nodig?	Nee	Contact verpleegkundige?	Nee
Pt036	Rust	4	2017-10-30 01:44:43	2017-10-30 01:44:43	Is de pijn dragelijk?	Ja	Extra pijnstilling nodig?	Ja	Contact verpleegkundige?	Nee
Pt036	Rust	4	2017-10-29 22:01:04	2017-10-29 22:01:04	Is de pijn dragelijk?	Ja	Extra pijnstilling nodig?	Nee	Contact verpleegkundige?	Nee
Pt036	Beweging	4	2017-10-29 21:50:53	2017-10-29 21:50:54	Is de pijn dragelijk?	Ja	Extra pijnstilling nodig?	Nee	Contact verpleegkundige?	Nee
Pt036	Rust	4	2017-10-29 20:12:14	2017-10-29 20:12:14	Is de pijn dragelijk?	Ja	Extra pijnstilling nodig?	Nee	Contact verpleegkundige?	Nee
Pt036	Beweging	4	2017-10-29 17:41:50	2017-10-29 17:41:50	Is de pijn dragelijk?	Ja	Extra pijnstilling nodig?	Nee	Contact verpleegkundige?	Nee
Pt036	Beweging	4	2017-10-29 14:01:40	2017-10-29 14:01:40	Is de pijn dragelijk?	Ja	Extra pijnstilling nodig?	Nee	Contact verpleegkundige?	Nee
Pt036	Rust	3	2017-10-29 12:05:57	2017-10-29 12:05:58	Is de pijn dragelijk?	Ja	Extra pijnstilling nodig?	Nee	Contact verpleegkundige?	Nee
Pt036	Rust	3	2017-10-29 09:53:05	2017-10-29 09:53:06	Is de pijn dragelijk?	Ja	Extra pijnstilling nodig?	Nee	Contact verpleegkundige?	Nee
Pt036	Beweging	5	2017-10-29 07:02:45	2017-10-29 07:02:46	Is de pijn dragelijk?	Ja	Extra pijnstilling nodig?	Nee	Contact verpleegkundige?	Nee
Pt036	Rust	4	2017-10-29 05:46:24	2017-10-29 05:46:25	Is de pijn dragelijk?	Nee	Extra pijnstilling nodig?	Ja	Contact verpleegkundige?	Ja
Pt036	Rust	3	2017-10-29 02:09:11	2017-10-29 02:09:12	Is de pijn dragelijk?	Ja	Extra pijnstilling nodig?	Nee	Contact verpleegkundige?	Nee
Pt036	Rust	3	2017-10-29 00:43:21	2017-10-29 00:43:22	Is de pijn dragelijk?	Ja	Extra pijnstilling nodig?	Nee	Contact verpleegkundige?	Nee
Pt036	Beweging	4	2017-10-28 22:32:07	2017-10-28 22:32:08	Is de pijn dragelijk?	Ja	Extra pijnstilling nodig?	Nee	Contact verpleegkundige?	Nee
Pt036	Rust	4	2017-10-28 18:53:40	2017-10-28 18:53:41	Is de pijn dragelijk?	Ja	Extra pijnstilling nodig?	Nee	Contact verpleegkundige?	Nee
Pt036	Beweging	5	2017-10-28 16:03:17	2017-10-28 16:03:18	Is de pijn dragelijk?	Ja	Extra pijnstilling nodig?	Nee	Contact verpleegkundige?	Nee
Pt036	Rust	4	2017-10-28 15:06:37	2017-10-28 15:06:38	Is de pijn dragelijk?	Ja	Extra pijnstilling nodig?	Nee	Contact verpleegkundige?	Nee
Pt036	Rust	4	2017-10-28 12:50:27	2017-10-28 12:50:28	Is de pijn dragelijk?	Ja	Extra pijnstilling nodig?	Nee	Contact verpleegkundige?	Nee
Pt036	Beweging	7	2017-10-28 10:10:58	2017-10-28 10:10:59	Is de pijn dragelijk?	Nee	Extra pijnstilling nodig?	Nee	Contact verpleegkundige?	Nee
Pt036	Beweging	6	2017-10-28 09:46:31	2017-10-28 09:46:32	Is de pijn dragelijk?	Ja	Extra pijnstilling nodig?	Nee	Contact verpleegkundige?	Nee
Pt036	Rust	4	2017-10-28 08:29:54	2017-10-28 08:29:55	Is de pijn dragelijk?	Ja	Extra pijnstilling nodig?	Nee	Contact verpleegkundige?	Nee
Pt036	Beweging	7	2017-10-28 00:12:14	2017-10-28 00:12:14	Is de pijn dragelijk?	Ja	Extra pijnstilling nodig?	Nee	Contact verpleegkundige?	Nee
Pt036	Rust	5	2017-10-28 00:10:54	2017-10-28 00:10:54	Is de pijn dragelijk?	Ja	Extra pijnstilling nodig?	Nee	Contact verpleegkundige?	Nee
Pt036	Rust	5	2017-10-27 20:36:25	2017-10-27 20:36:26	Is de pijn dragelijk?	Ja	Extra pijnstilling nodig?	Nee	Contact verpleegkundige?	Nee
Pt036	Rust	4	2017-10-27 19:00:04	2017-10-27 19:00:05	Is de pijn dragelijk?	Ja	Extra pijnstilling nodig?	Nee	Contact verpleegkundige?	Nee
Pt036	Beweging	7	2017-10-27 18:59:05	2017-10-27 18:59:06	Is de pijn dragelijk?	Ja	Extra pijnstilling nodig?	Nee	Contact verpleegkundige?	Nee
Pt036	Rust	6	2017-10-27 17:00:42	2017-10-27 17:00:42	Is de pijn dragelijk?	Ja	Extra pijnstilling nodig?	Nee	Contact verpleegkundige?	Nee
Pt036	Rust	7	2017-10-27 15:34:50	2017-10-27 15:34:50	Is de pijn dragelijk?	Ja	Extra pijnstilling nodig?	Nee	Contact verpleegkundige?	Nee
Pt036	Beweging	7	2017-10-27 15:33:48	2017-10-27 15:33:49	Is de pijn dragelijk?	Ja	Extra pijnstilling nodig?	Nee	Contact verpleegkundige?	Nee
Pt036	Beweging	7	2017-10-27 13:52:34	2017-10-27 13:52:34	Is de pijn dragelijk?	Ja	Extra pijnstilling nodig?	Nee	Contact verpleegkundige?	Nee
Pt036	Rust	3	2017-10-27 13:46:06	2017-10-27 13:46:06	Is de pijn dragelijk?	Ja	Extra pijnstilling nodig?	Nee	Contact verpleegkundige?	Nee
Pt037	Rust	2	2017-10-27 06:16:34	2017-10-27 06:16:35	Is de pijn dragelijk?	Ja	Extra pijnstilling nodig?	Nee	Contact verpleegkundige?	Nee
Pt037	Rust	3	2017-10-27 09:49:26	2017-10-27 09:49:27	Is de pijn dragelijk?	Ja	Extra pijnstilling nodig?	Nee	Contact verpleegkundige?	Nee
Pt037	Beweging	4	2017-10-27 12:08:20	2017-10-27 12:08:20	Is de pijn dragelijk?	Ja	Extra pijnstilling nodig?	Nee	Contact verpleegkundige?	Nee
Pt037	Rust	2	2017-10-27 15:33:37	2017-10-27 15:33:38	Is de pijn dragelijk?	Ja	Extra pijnstilling nodig?	Nee	Contact verpleegkundige?	Nee
Pt037	Rust	2	2017-10-27 16:45:33	2017-10-27 16:45:34	Is de pijn dragelijk?	Ja	Extra pijnstilling nodig?	Nee	Contact verpleegkundige?	Nee
Pt038	Beweging	6	2017-10-27 20:47:20	2017-10-27 20:47:21	Is de pijn dragelijk?	Ja	Extra pijnstilling nodig?	Nee	Contact verpleegkundige?	Nee
Pt038	Rust	1	2017-10-28 07:09:15	2017-10-28 07:09:16	Is de pijn dragelijk?	Ja	Extra pijnstilling nodig?	Nee	Contact verpleegkundige?	Nee
Pt038	Beweging	0	2017-10-28 12:55:26	2017-10-28 12:55:27	Is de pijn dragelijk?	Ja	Extra pijnstilling nodig?	Nee	Contact verpleegkundige?	Nee
Pt038	Rust	1	2017-10-28 17:12:54	2017-10-28 17:12:55	Is de pijn dragelijk?	Ja	Extra pijnstilling nodig?	Ja	Contact verpleegkundige?	Nee
Pt038	Rust	1	2017-10-28 23:31:08	2017-10-28 23:31:08	Is de pijn dragelijk?	Ja	Extra pijnstilling nodig?	Nee	Contact verpleegkundige?	Nee
Pt039	Rust	2	2017-10-31 16:38:55	2017-10-31 16:38:56	Is de pijn dragelijk?	Ja	Extra pijnstilling nodig?	Nee	Contact verpleegkundige?	Nee
Pt039	Beweging	9	2017-10-31 18:25:45	2017-10-31 18:25:45	Is de pijn dragelijk?	Ja	Extra pijnstilling nodig?	Nee	Contact verpleegkundige?	Nee
Pt039	Rust	3	2017-10-31 20:42:49	2017-10-31 20:42:49	Is de pijn dragelijk?	Ja	Extra pijnstilling nodig?	Nee	Contact verpleegkundige?	Nee
Pt039	Beweging	7	2017-11-01 00:11:43	2017-11-01 00:11:43	Is de pijn dragelijk?	Ja	Extra pijnstilling nodig?	Nee	Contact verpleegkundige?	Nee
Pt039	Rust	2	2017-11-01 08:10:15	2017-11-01 08:10:16	Is de pijn dragelijk?	Ja	Extra pijnstilling nodig?	Nee	Contact verpleegkundige?	Nee
Pt039	Rust	7	2017-11-01 10:03:45	2017-11-01 10:06:01	Is de pijn dragelijk?	Ja	Extra pijnstilling nodig?	Nee	Contact verpleegkundige?	Nee
Pt040	Beweging	7	2017-11-01 16:08:10	2017-11-01 16:08:11	Is de pijn dragelijk?	Ja	Extra pijnstilling nodig?	Ja	Contact verpleegkundige?	Ja
Pt040	Rust	9	2017-11-01 23:24:32	2017-11-01 23:24:32	Is de pijn dragelijk?	Ja	Extra pijnstilling nodig?	Ja	Contact verpleegkundige?	Ja
Pt040	Beweging	7	2017-11-02 07:13:38	2017-11-02 07:13:38	Is de pijn dragelijk?	Ja	Extra pijnstilling nodig?	Ja	Contact verpleegkundige?	Ja
Pt040	Beweging	5	2017-11-02 11:54:17	2017-11-02 11:54:16	Is de pijn dragelijk?	Ja	Extra pijnstilling nodig?	Ja	Contact verpleegkundige?	Nee
Pt040	Rust	7	2017-11-02 16:08:03	2017-11-02 16:08:03	Is de pijn dragelijk?	Ja	Extra pijnstilling nodig?	Ja	Contact verpleegkundige?	Ja
Pt040	Rust	6	2017-11-02 18:42:57	2017-11-02 18:42:57	Is de pijn dragelijk?	Ja	Extra pijnstilling nodig?	Ja	Contact verpleegkundige?	Nee
Pt040	Rust	6	2017-11-03 02:41:35	2017-11-03 02:41:34	Is de pijn dragelijk?	Ja	Extra pijnstilling nodig?	Ja	Contact verpleegkundige?	Ja
Pt040	Rust	7	2017-11-03 07:18:14	2017-11-03 07:18:13	Is de pijn dragelijk?	Ja	Extra pijnstilling nodig?	Nee	Contact verpleegkundige?	Nee
Pt041	Rust	7	2017-11-01 18:40:47	2017-11-01 18:40:47	Is de pijn dragelijk?	Ja	Extra pijnstilling nodig?	Nee	Contact verpleegkundige?	Nee
Pt041	Rust	6	2017-11-01 20:56:58	2017-11-01 20:56:58	Is de pijn dragelijk?	Ja	Extra pijnstilling nodig?	Nee	Contact verpleegkundige?	Nee
Pt041	Rust	6	2017-11-01 23:00:39	2017-11-01 23:00:40	Is de pijn dragelijk?	Ja	Extra pijnstilling nodig?	Nee	Contact verpleegkundige?	Nee
Pt041	Rust	7	2017-11-02 07:36:55	2017-11-02 07:36:56	Is de pijn dragelijk?	Ja	Extra pijnstilling nodig?	Nee	Contact verpleegkundige?	Nee
Pt042	Beweging	9	2017-10-31 15:11:24	2017-10-31 15:11:25	Is de pijn dragelijk?	Nee	Extra pijnstilling nodig?	Ja	Contact verpleegkundige?	Nee
Pt042	Beweging	9	2017-10-31 17:15:51	2017-10-31 17:15:52	Is de pijn dragelijk?	Ja	Extra pijnstilling nodig?	Ja	Contact verpleegkundige?	Ja
Pt042	Beweging	9	2017-10-31 18:39:38	2017-10-31 18:39:39	Is de pijn dragelijk?	Ja	Extra pijnstilling nodig?	Ja	Contact verpleegkundige?	Ja
Pt042	Rust	8	2017-10-31 22:08:10	2017-10-31 22:08:11	Is de pijn dragelijk?	Ja	Extra pijnstilling nodig?	Nee	Contact verpleegkundige?	Nee
Pt043	Rust	2	2017-11-01 14:38:53	2017-11-01 14:38:54	Is de pijn dragelijk?	Ja	Extra pijnstilling nodig?	Nee	Contact verpleegkundige?	Nee
Pt043	Rust	3	2017-11-01 15:22:12	2017-11-01 15:22:13	Is de pijn dragelijk?	Ja	Extra pijnstilling nodig?	Nee	Contact verpleegkundige?	Nee
Pt043	Rust	2	2017-11-01 16:22:58	2017-11-01 16:22:59	Is de pijn dragelijk?	Ja	Extra pijnstilling nodig?	Nee	Contact verpleegkundige?	Nee
Pt043	Rust	2	2017-11-01 17:02:14	2017-11-01 17:02:14	Is de pijn dragelijk?	Ja	Extra pijnstilling nodig?	Nee	Contact verpleegkundige?	Nee
Pt043	Rust	3	2017-11-01 19:09:26	2017-11-01 19:09:26	Is de pijn dragelijk?	Ja	Extra pijnstilling nodig?	Nee	Contact verpleegkundige?	Nee
Pt043	Rust	3	2017-11-01 20:52:58	2017-11-01 20:52:58	Is de pijn dragelijk?	Ja	Extra pijnstilling nodig?	Nee	Contact verpleegkundige?	Nee
Pt043	Rust	2	2017-11-01 22:42:07	2017-11-01 22:42:07	Is de pijn dragelijk?	Ja	Extra pijnstilling nodig?	Nee	Contact verpleegkundige?	Nee
Pt043	Rust	2	2017-11-02 06:40:56	2017-11-02 06:40:58	Is de pijn dragelijk?	Ja	Extra pijnstilling nodig?	Nee	Contact verpleegkundige?	Nee
Pt043	Rust	2	2017-11-02 12:23:59	2017-11-02 12:24:01	Is de pijn dragelijk?	Ja	Extra pijnstilling nodig?	Nee	Contact verpleegkundige?	Nee
Pt044	vervangen
Pt045	Rust	7	2017-11-07 07:09:36	2017-11-07 07:09:36	Is de pijn dragelijk?	Ja	Extra pijnstilling nodig?	Ja	Contact verpleegkundige?	Ja
Pt045	Rust	8	2017-11-07 03:03:29	2017-11-07 03:03:29	Is de pijn dragelijk?	Nee	Extra pijnstilling nodig?	Ja	Contact verpleegkundige?	Ja
Pt045	Rust	9	2017-11-07 00:35:46	2017-11-07 00:35:47	Is de pijn dragelijk?	Nee	Extra pijnstilling nodig?	Ja	Contact verpleegkundige?	Ja
Pt045	Rust	7	2017-11-06 22:46:58	2017-11-06 22:46:58	Is de pijn dragelijk?	Ja	Extra pijnstilling nodig?	Ja	Contact verpleegkundige?	Ja
Pt046	Beweging	4	2017-11-05 10:45:36	2017-11-05 10:45:36	Is de pijn dragelijk?	Ja	Extra pijnstilling nodig?	Ja	Contact verpleegkundige?	Nee
Pt046	Beweging	4	2017-11-04 11:39:44	2017-11-04 11:39:43	Is de pijn dragelijk?	Ja	Extra pijnstilling nodig?	Ja	Contact verpleegkundige?	Nee
Pt046	Beweging	9	2017-11-03 17:43:55	2017-11-03 17:43:55	Is de pijn dragelijk?	Nee	Extra pijnstilling nodig?	Ja	Contact verpleegkundige?	Nee
Pt046	Beweging	9	2017-11-03 15:02:31	2017-11-03 15:02:31	Is de pijn dragelijk?	Nee	Extra pijnstilling nodig?	Ja	Contact verpleegkundige?	Nee
Pt046	Beweging	4	2017-11-03 01:44:58	2017-11-03 01:44:56	Is de pijn dragelijk?	Ja	Extra pijnstilling nodig?	Ja	Contact verpleegkundige?	Nee
Pt047	Beweging	2	2017-11-06 12:03:08	2017-11-06 12:03:09	Is de pijn dragelijk?	Ja	Extra pijnstilling nodig?	Nee	Contact verpleegkundige?	Nee
Pt047	Rust	1	2017-11-06 00:37:33	2017-11-06 00:37:34	Is de pijn dragelijk?	Ja	Extra pijnstilling nodig?	Nee	Contact verpleegkundige?	Nee
Pt047	Beweging	3	2017-11-05 18:11:49	2017-11-05 18:11:49	Is de pijn dragelijk?	Ja	Extra pijnstilling nodig?	Nee	Contact verpleegkundige?	Nee
Pt047	Beweging	4	2017-11-05 12:11:53	2017-11-05 12:11:53	Is de pijn dragelijk?	Ja	Extra pijnstilling nodig?	Nee	Contact verpleegkundige?	Nee
Pt047	Rust	3	2017-11-05 07:25:37	2017-11-05 07:25:38	Is de pijn dragelijk?	Ja	Extra pijnstilling nodig?	Nee	Contact verpleegkundige?	Nee
Pt047	Rust	3	2017-11-04 17:32:22	2017-11-04 17:32:22	Is de pijn dragelijk?	Ja	Extra pijnstilling nodig?	Nee	Contact verpleegkundige?	Nee
Pt047	Rust	3	2017-11-04 12:07:21	2017-11-04 12:07:20	Is de pijn dragelijk?	Ja	Extra pijnstilling nodig?	Nee	Contact verpleegkundige?	Nee
Pt047	Rust	4	2017-11-04 07:06:29	2017-11-04 07:06:29	Is de pijn dragelijk?	Ja	Extra pijnstilling nodig?	Nee	Contact verpleegkundige?	Nee
Pt047	Rust	4	2017-11-03 17:45:48	2017-11-03 17:45:49	Is de pijn dragelijk?	Ja	Extra pijnstilling nodig?	Nee	Contact verpleegkundige?	Nee
Pt048	Beweging	2	2017-11-05 17:00:21	2017-11-05 16:59:50	Is de pijn dragelijk?	Ja	Extra pijnstilling nodig?	Nee	Contact verpleegkundige?	Nee
Pt048	Rust	3	2017-11-05 12:00:42	2017-11-05 12:00:11	Is de pijn dragelijk?	Ja	Extra pijnstilling nodig?	Nee	Contact verpleegkundige?	Nee
Pt048	Beweging	3	2017-11-05 10:12:56	2017-11-05 10:12:25	Is de pijn dragelijk?	Ja	Extra pijnstilling nodig?	Nee	Contact verpleegkundige?	Nee
Pt048	Beweging	3	2017-11-05 08:14:57	2017-11-05 08:14:27	Is de pijn dragelijk?	Ja	Extra pijnstilling nodig?	Ja	Contact verpleegkundige?	Nee
Pt048	Rust	2	2017-11-05 05:06:03	2017-11-05 05:05:33	Is de pijn dragelijk?	Ja	Extra pijnstilling nodig?	Nee	Contact verpleegkundige?	Nee
Pt048	Rust	4	2017-11-04 19:26:40	2017-11-04 19:26:09	Is de pijn dragelijk?	Nee	Extra pijnstilling nodig?	Ja	Contact verpleegkundige?	Ja
Pt048	Rust	4	2017-11-04 18:45:52	2017-11-04 18:45:21	Is de pijn dragelijk?	Ja	Extra pijnstilling nodig?	Ja	Contact verpleegkundige?	Nee
Pt049	vervangen
Pt050	Rust	7	2017-11-04 20:30:25	2017-11-04 20:30:26	Is de pijn dragelijk?	Nee	Extra pijnstilling nodig?	Ja	Contact verpleegkundige?	Ja
Pt050	Rust	7	2017-11-03 10:21:34	2017-11-03 10:21:35	Is de pijn dragelijk?	Ja	Extra pijnstilling nodig?	Ja	Contact verpleegkundige?	Ja
Pt050	Beweging	5	2017-11-02 22:29:22	2017-11-02 22:29:24	Is de pijn dragelijk?	Ja	Extra pijnstilling nodig?	Ja	Contact verpleegkundige?	Ja
Pt050	Beweging	6	2017-11-02 17:39:07	2017-11-02 17:39:09	Is de pijn dragelijk?	Ja	Extra pijnstilling nodig?	Ja	Contact verpleegkundige?	Ja
Pt050	Beweging	0	2017-11-02 17:37:38	2017-11-02 17:37:40	Is de pijn dragelijk?	Ja	Extra pijnstilling nodig?	Ja	Contact verpleegkundige?	Ja
Pt051	Beweging	2	2017-11-07 09:48:41	2017-11-07 09:48:40	Is de pijn dragelijk?	Ja	Extra pijnstilling nodig?	Nee	Contact verpleegkundige?	Nee
Pt051	Rust	2	2017-11-06 23:57:36	2017-11-06 23:57:36	Is de pijn dragelijk?	Ja	Extra pijnstilling nodig?	Nee	Contact verpleegkundige?	Nee
Pt051	Rust	2	2017-11-06 18:28:37	2017-11-06 18:28:37	Is de pijn dragelijk?	Ja	Extra pijnstilling nodig?	Nee	Contact verpleegkundige?	Nee
Pt052	Beweging	9	2017-11-08 03:46:40	2017-11-08 03:46:39	Is de pijn dragelijk?	Nee	Extra pijnstilling nodig?	Ja	Contact verpleegkundige?	Nee
Pt052	Beweging	8	2017-11-07 21:59:00	2017-11-07 21:59:01	Is de pijn dragelijk?	Nee	Extra pijnstilling nodig?	Ja	Contact verpleegkundige?	Nee
Pt052	Beweging	10	2017-11-07 08:31:32	2017-11-07 08:31:30	Is de pijn dragelijk?	Nee	Extra pijnstilling nodig?	Ja	Contact verpleegkundige?	Ja
Pt052	Rust	4	2017-11-07 07:14:16	2017-11-07 07:14:15	Is de pijn dragelijk?	Ja	Extra pijnstilling nodig?	Nee	Contact verpleegkundige?	Nee
Pt052	Rust	6	2017-11-06 22:46:50	2017-11-06 22:46:51	Is de pijn dragelijk?	Ja	Extra pijnstilling nodig?	Nee	Contact verpleegkundige?	Ja
